# Supplementary material for: Superacid synthesized tertiary benzenesulfonamides and benzofuzed sultams act as selective hCA IX inhibitors: toward understanding a new mode of inhibition by tertiary sulfonamides
Source: Royal Society of Chemistry journal article supplement (doi:10.1039/c3ob41538d), 2013-01-01

SUPPORTING INFORMATION

**Superacid synthesized tertiary benzenesulfonamides and  
benzofused sultams act as selective hCA IX inhibitors: toward the  
understanding of the new mode of inhibition by sulfonamides**

*Benoît Metayer,<sup>a</sup> Agnès Mingot,<sup>a</sup> Daniella Vullo,<sup>b</sup> Claudiu T. Supuran,<sup>b\*</sup> and Sébastien Thibaudeau<sup>a\*</sup>*

<sup>a</sup> Groupe Superacide, Equipe « Synthèse Organique », Institut de Chimie des Milieux et des Matériaux de Poitiers (IC2MP) - UMR CNRS 7285 - Université de Poitiers - 4 rue Michel Brunet, 86022 Poitiers Cedex, France

<sup>b</sup> Università degli Studi di Firenze, Laboratorio di Chimica Bioinorganica, Rm 188, Via della Lastruccia 3, I-50019 Sesto Fiorentino (Firenze), Italy

Fax: (+) 33-549453501 Tel: (+) 33-549454588

sebastien.thibaudeau@univ-poitiers.fr

**<sup>1</sup>H and <sup>13</sup>C NMR spectra**

### Compound 3a

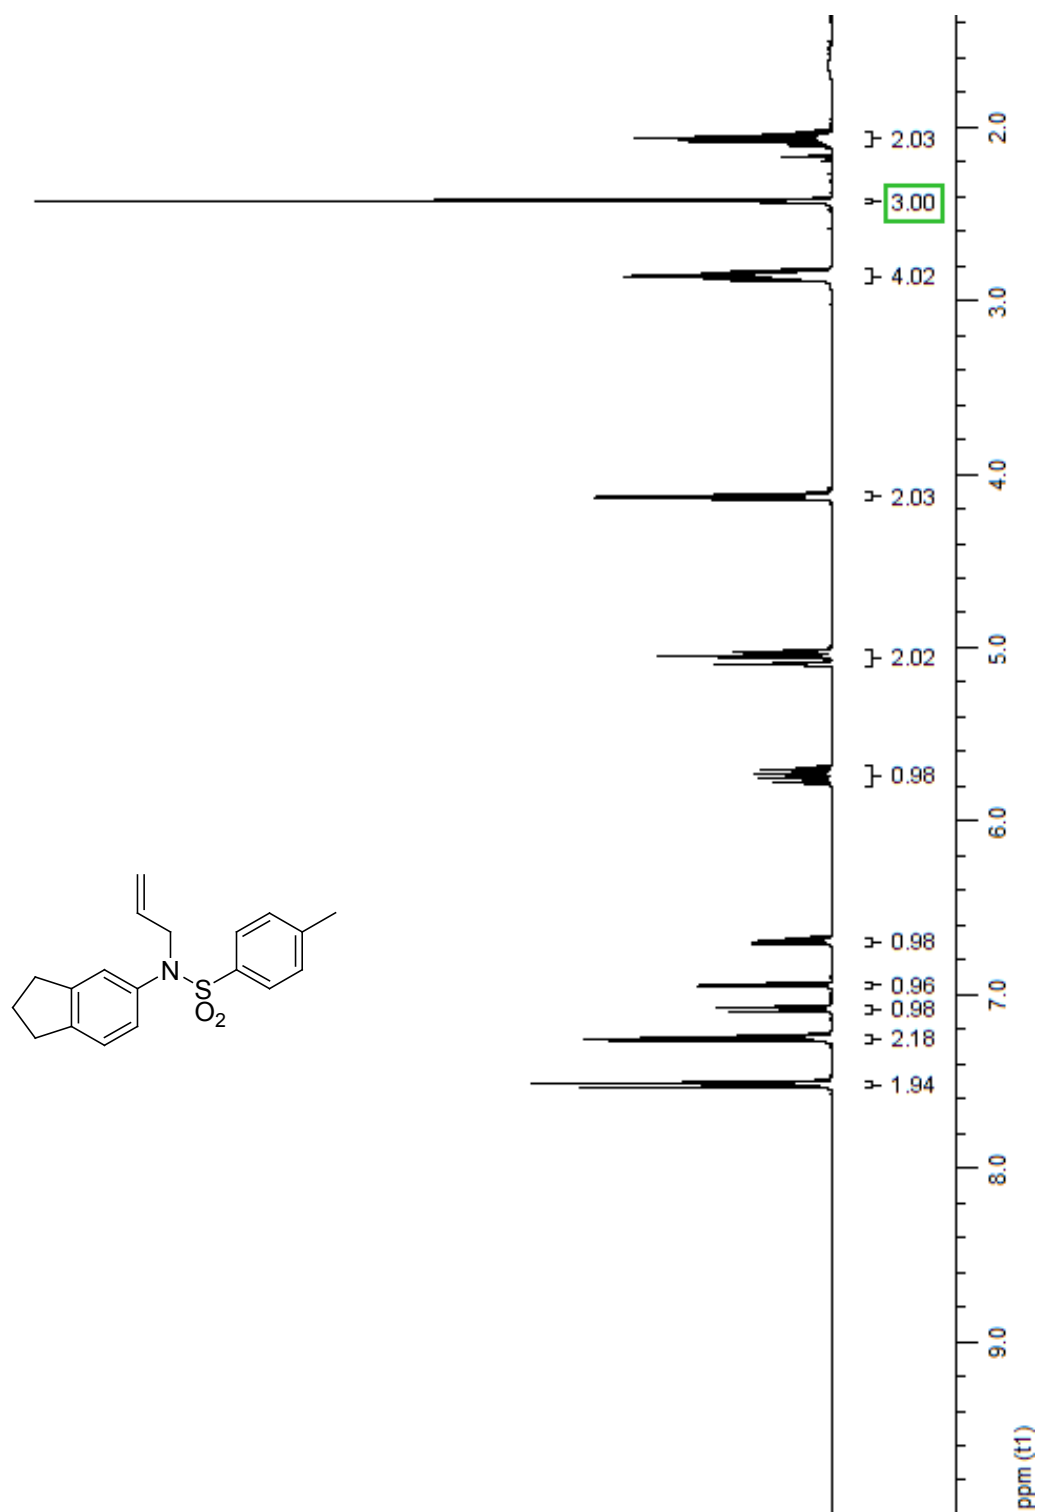

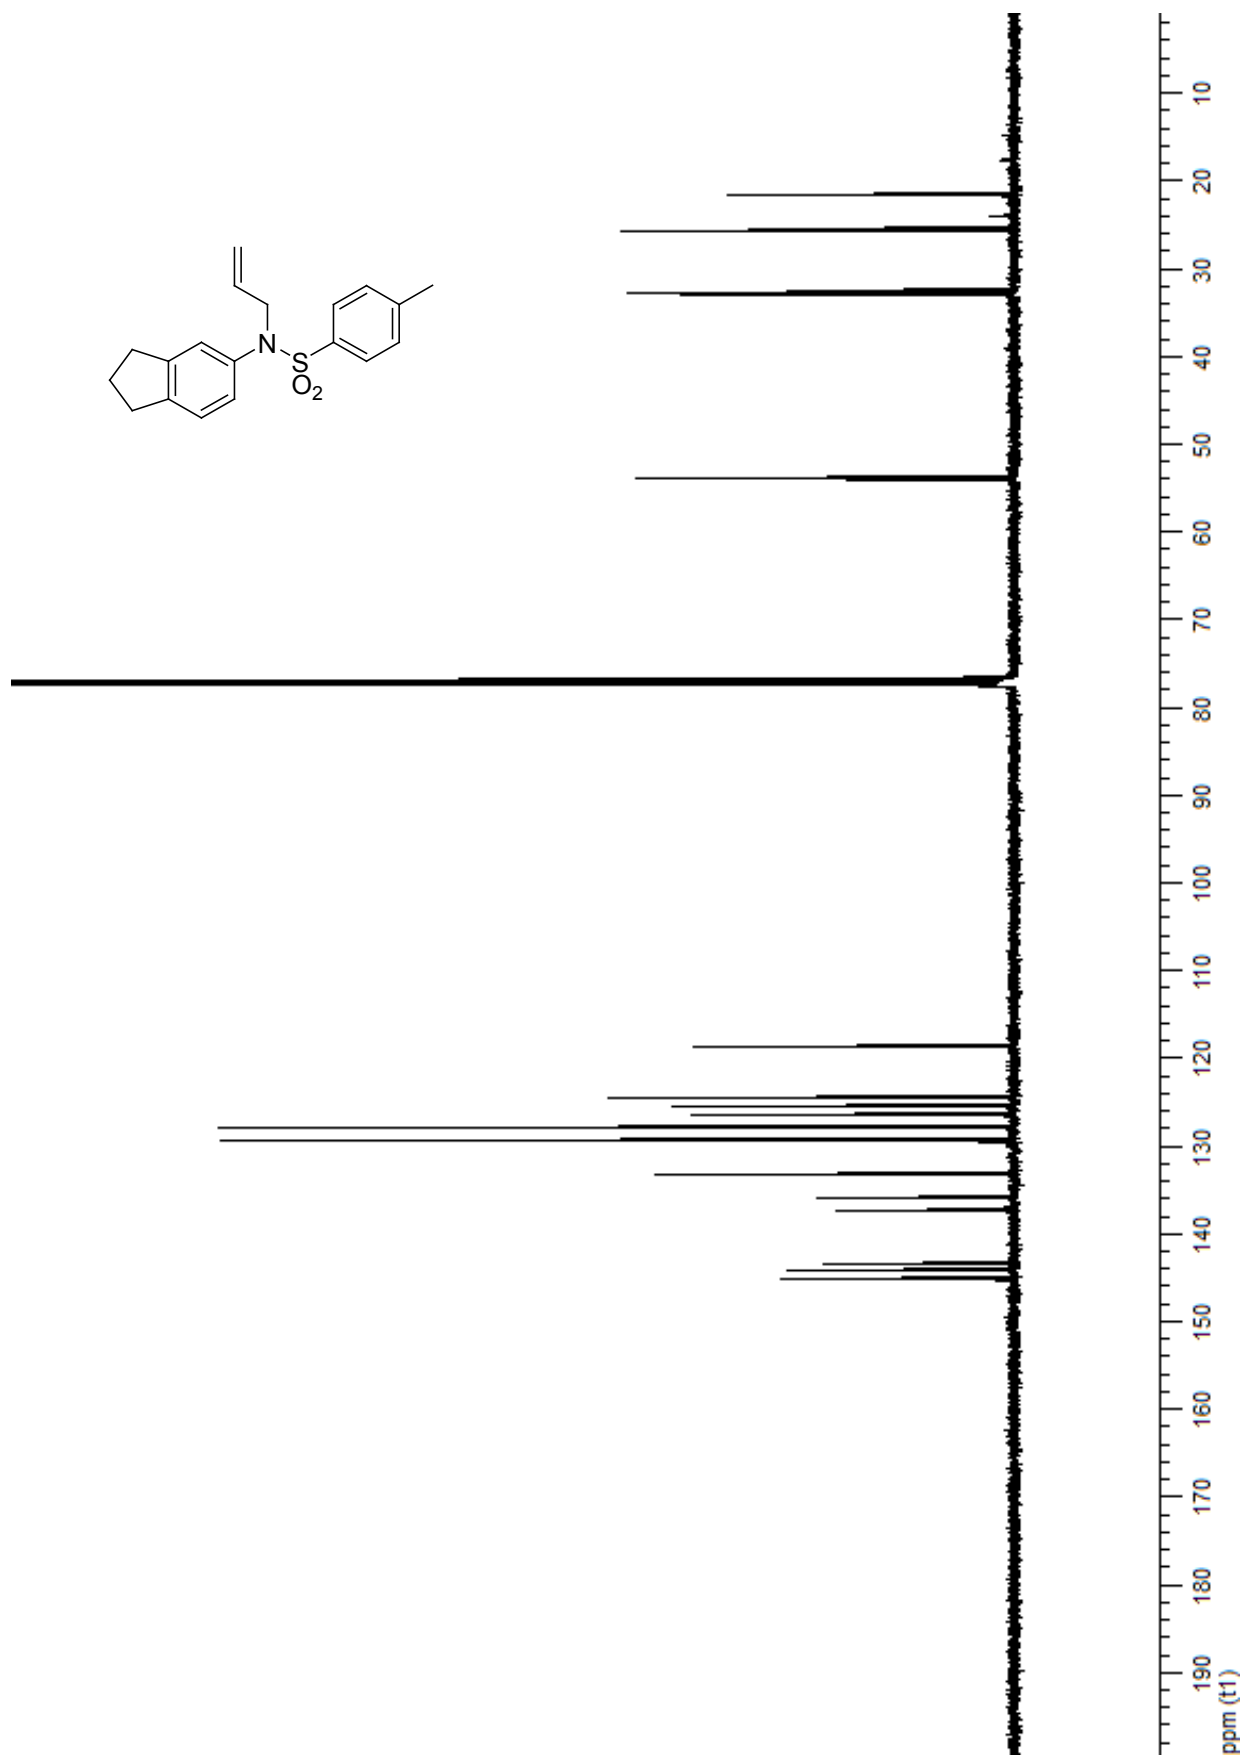

### Compound 3b

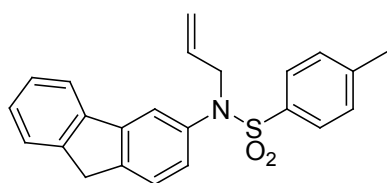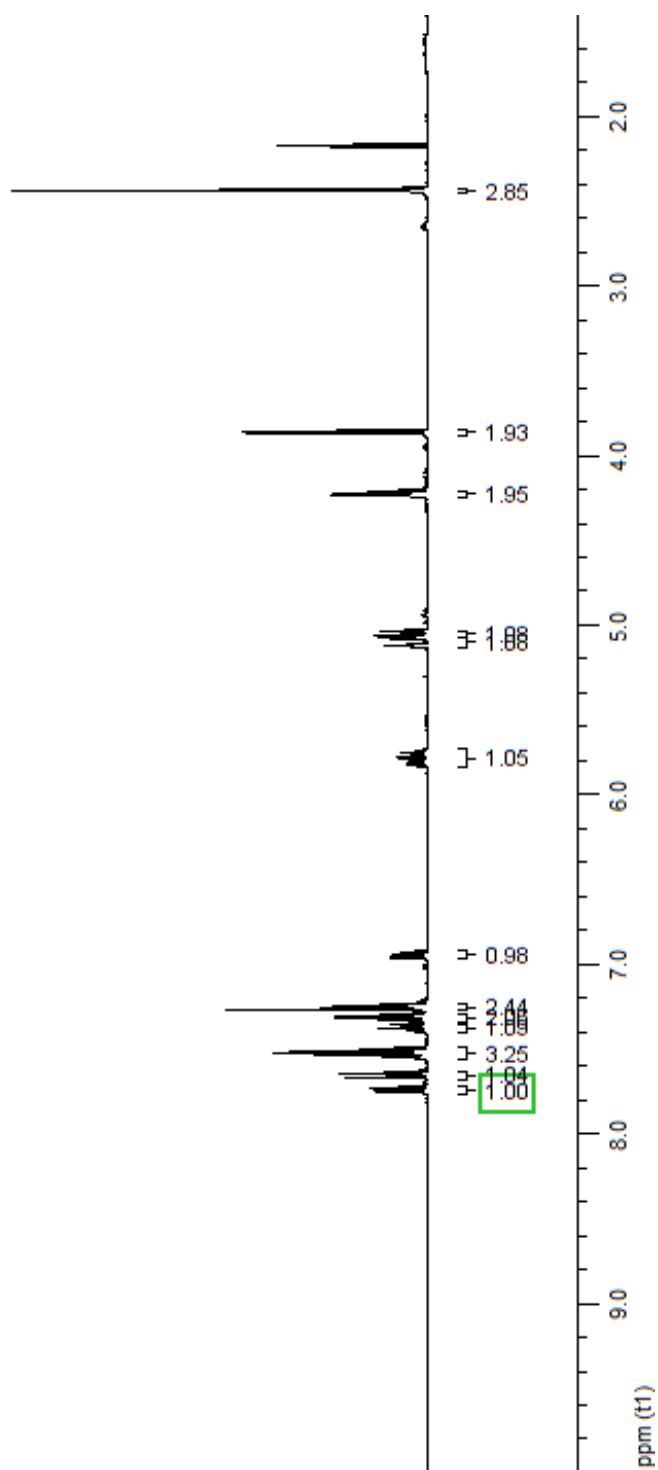

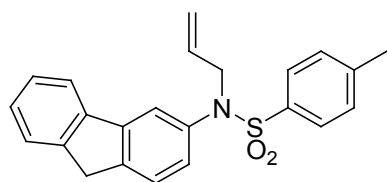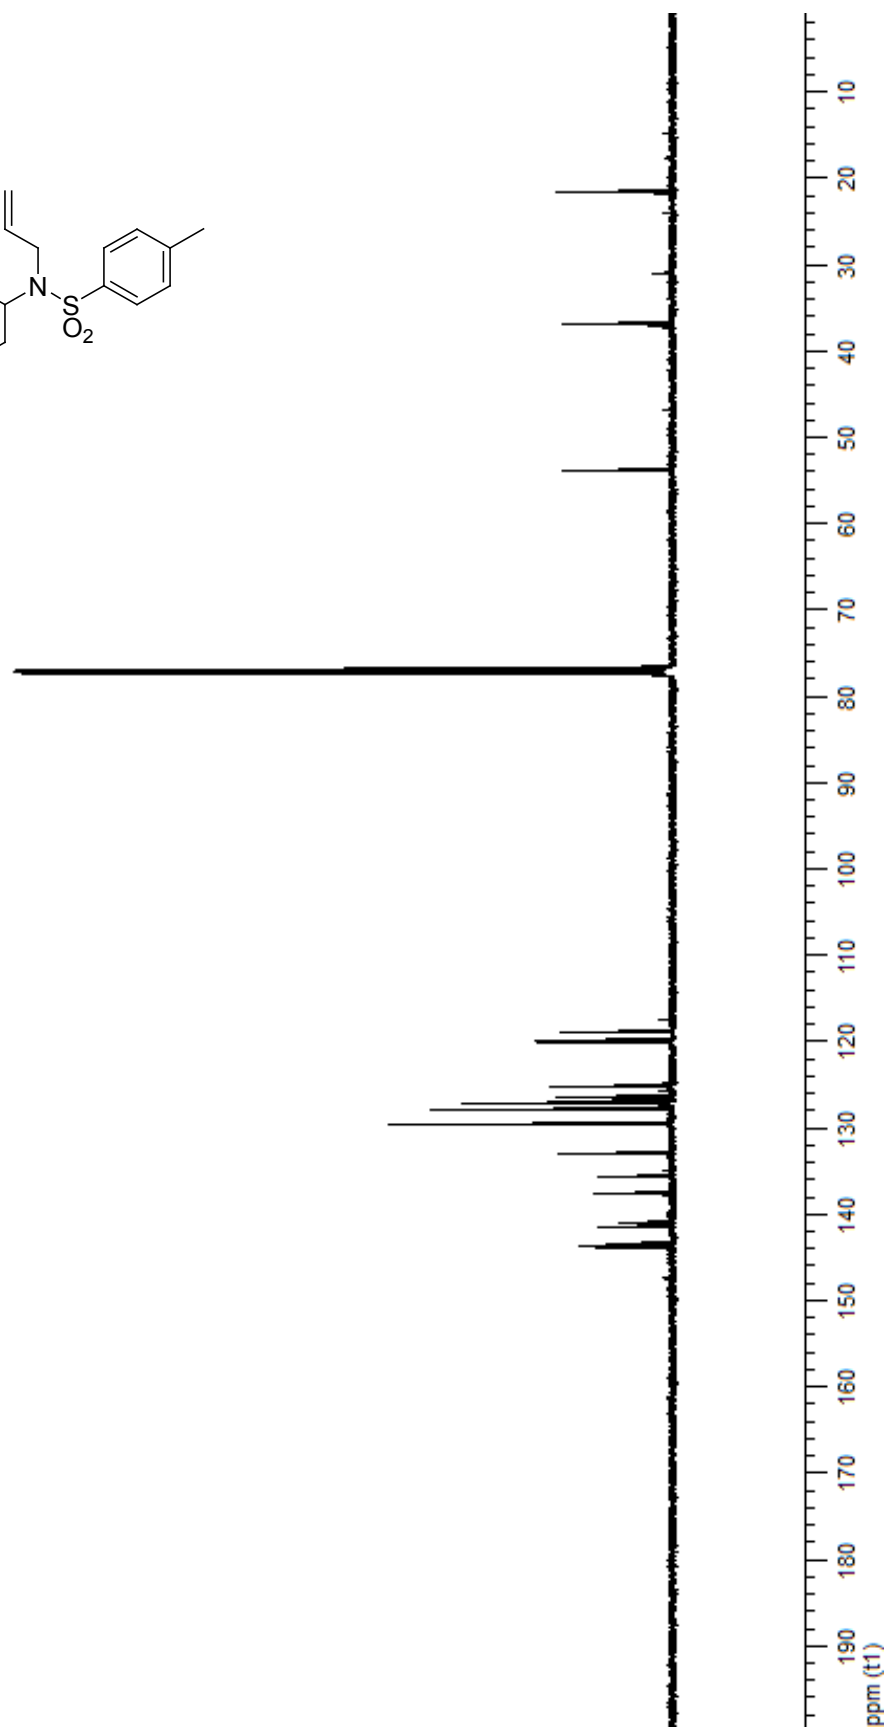

### Compound 3c

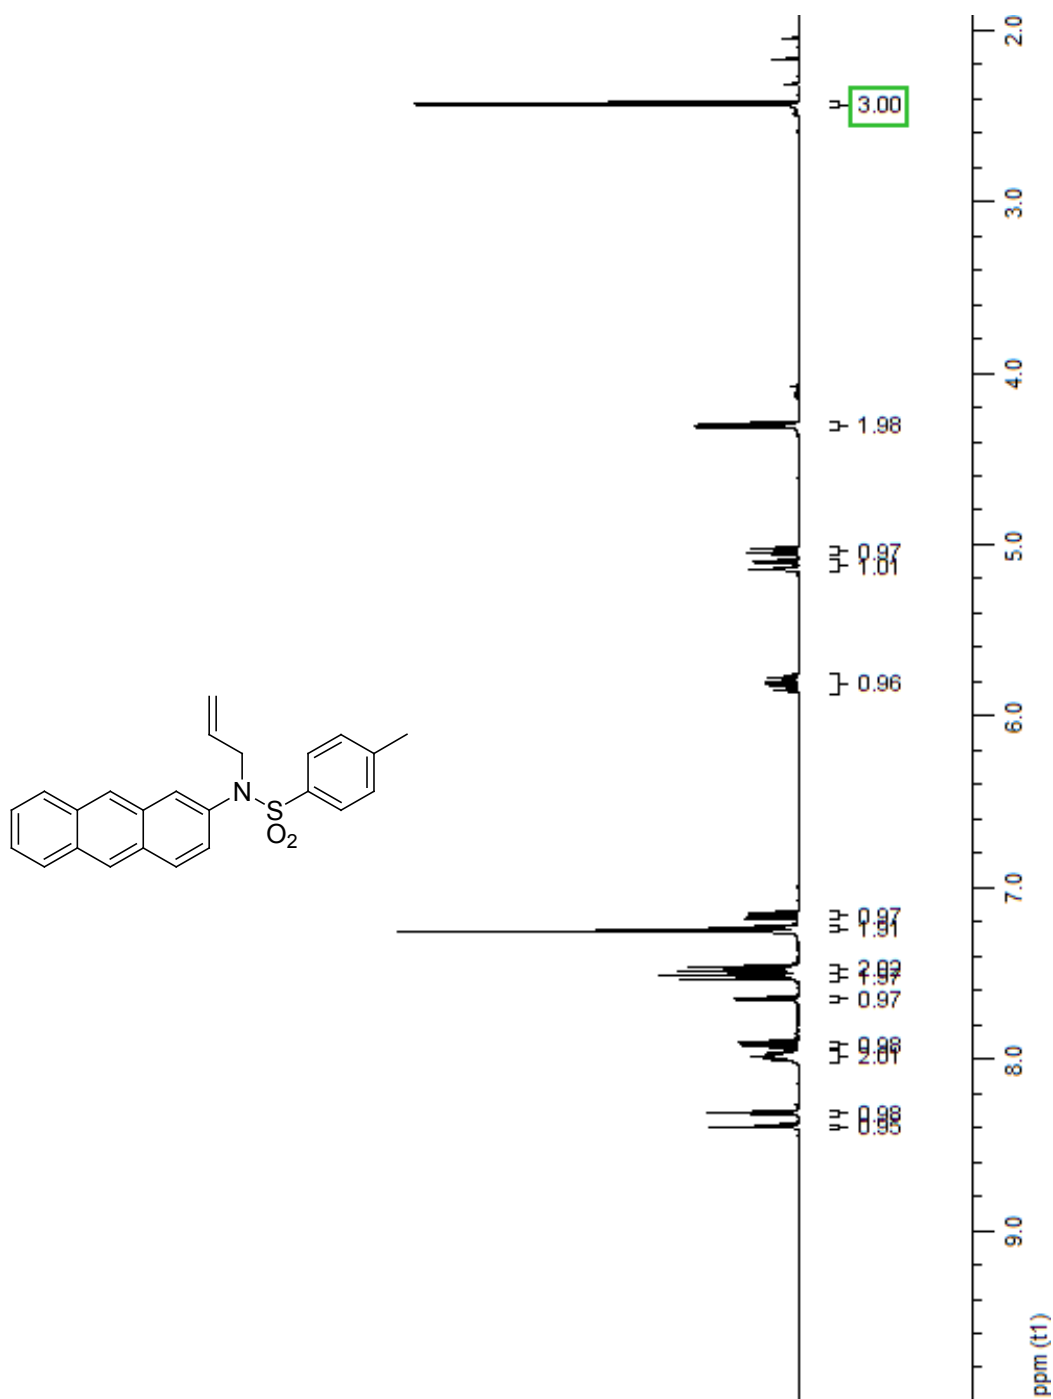

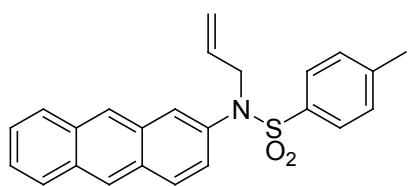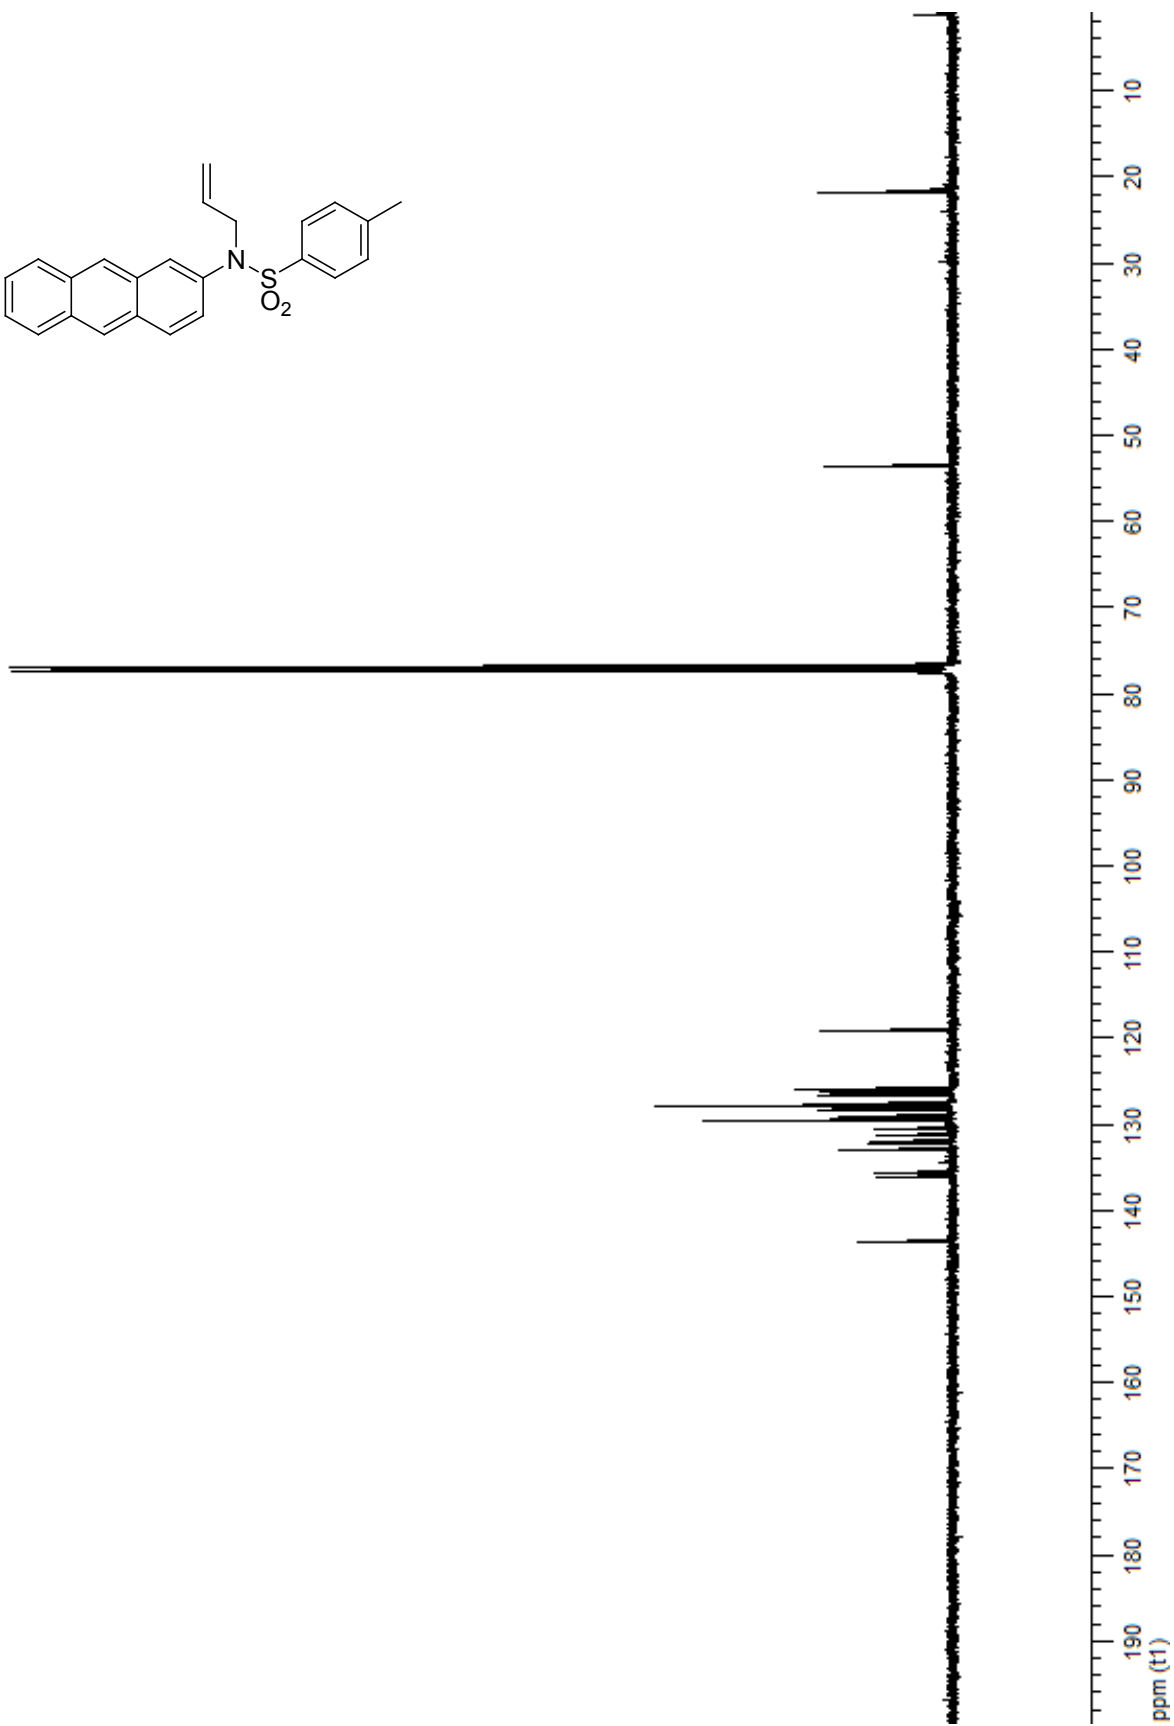

### Compound 3d

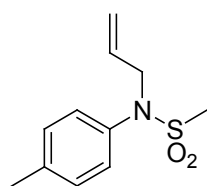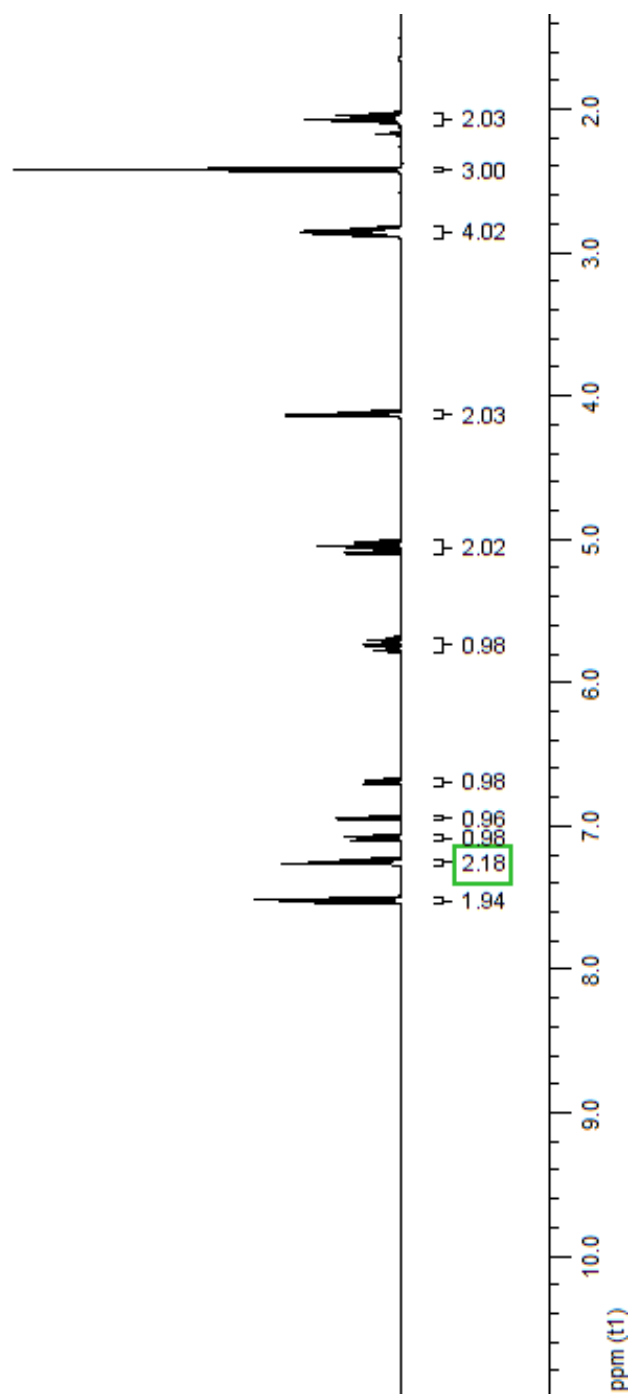



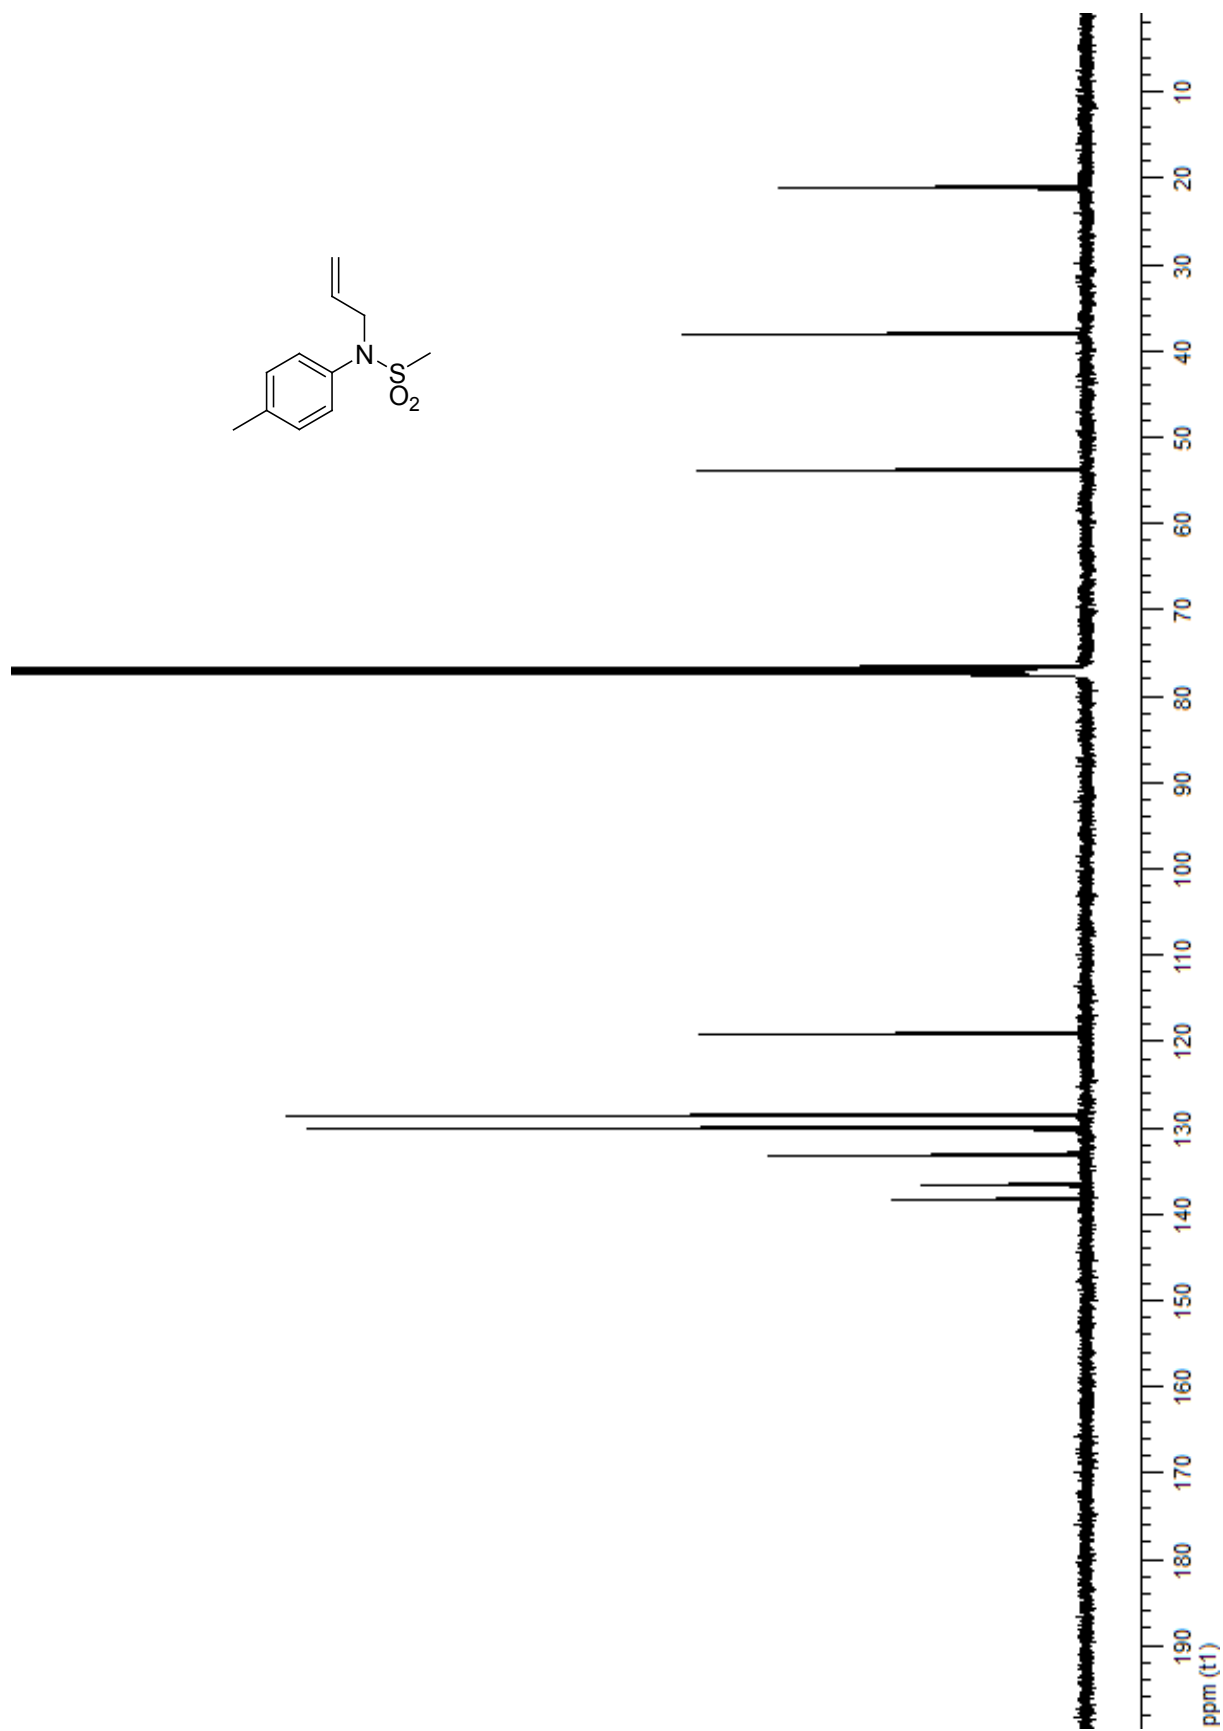

### Compound 3e

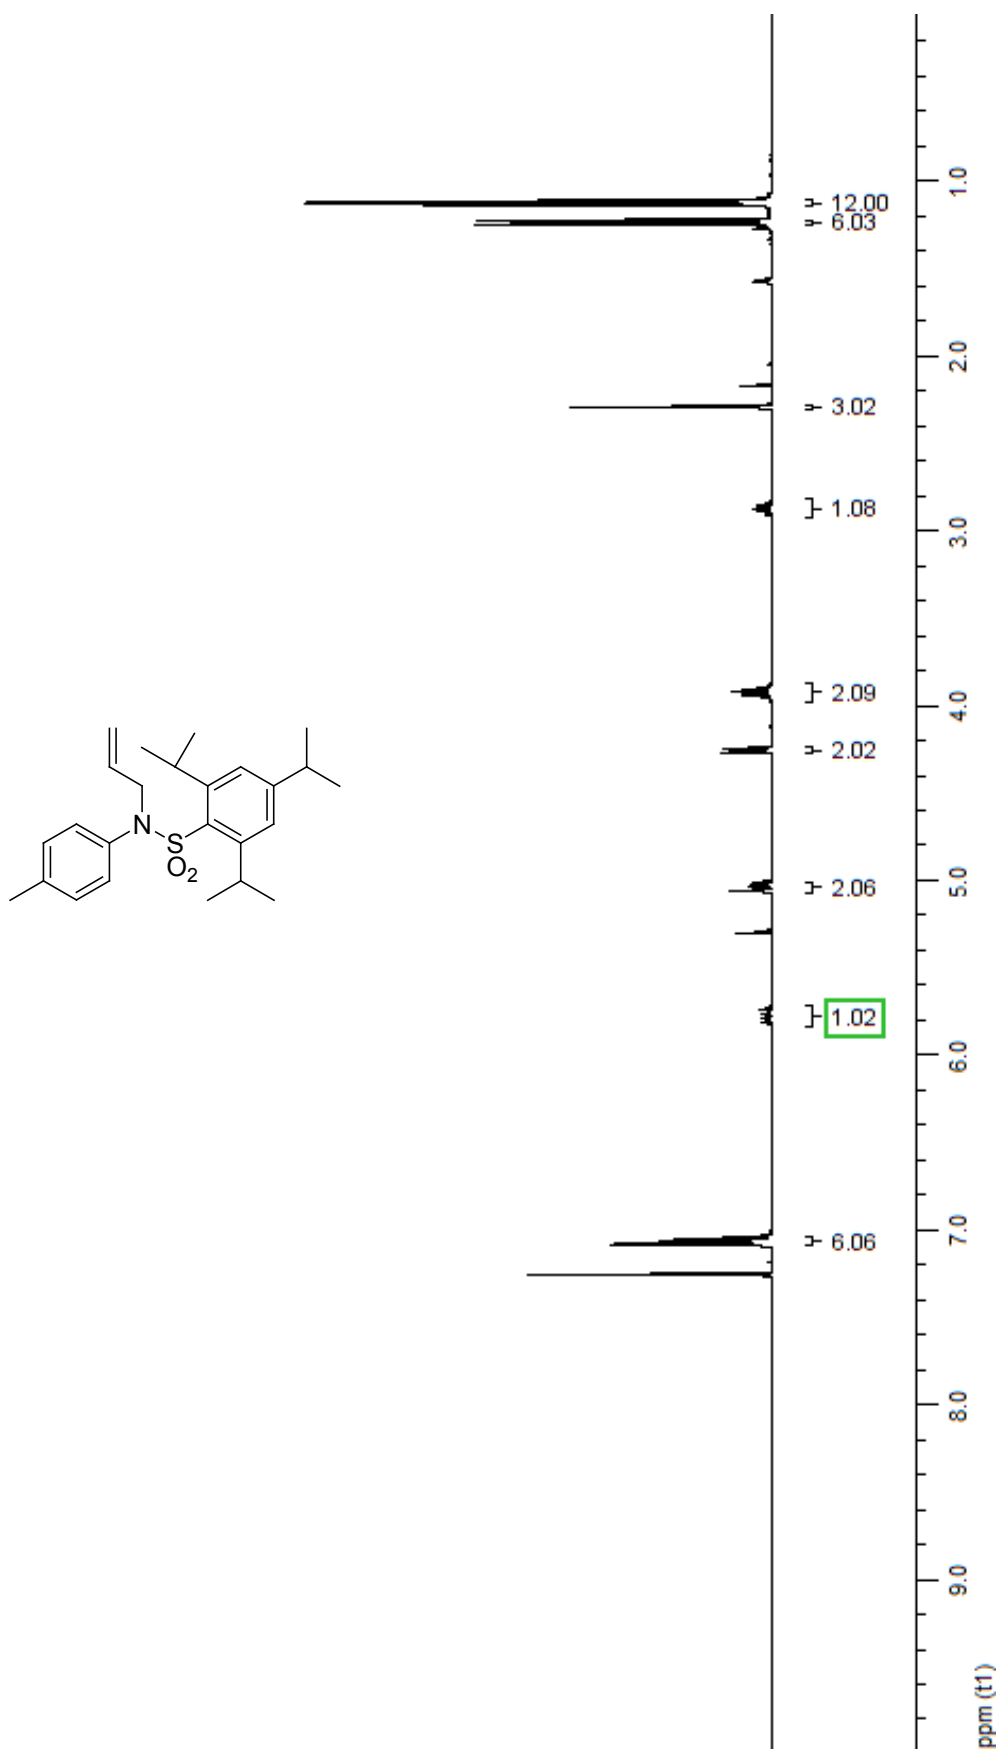

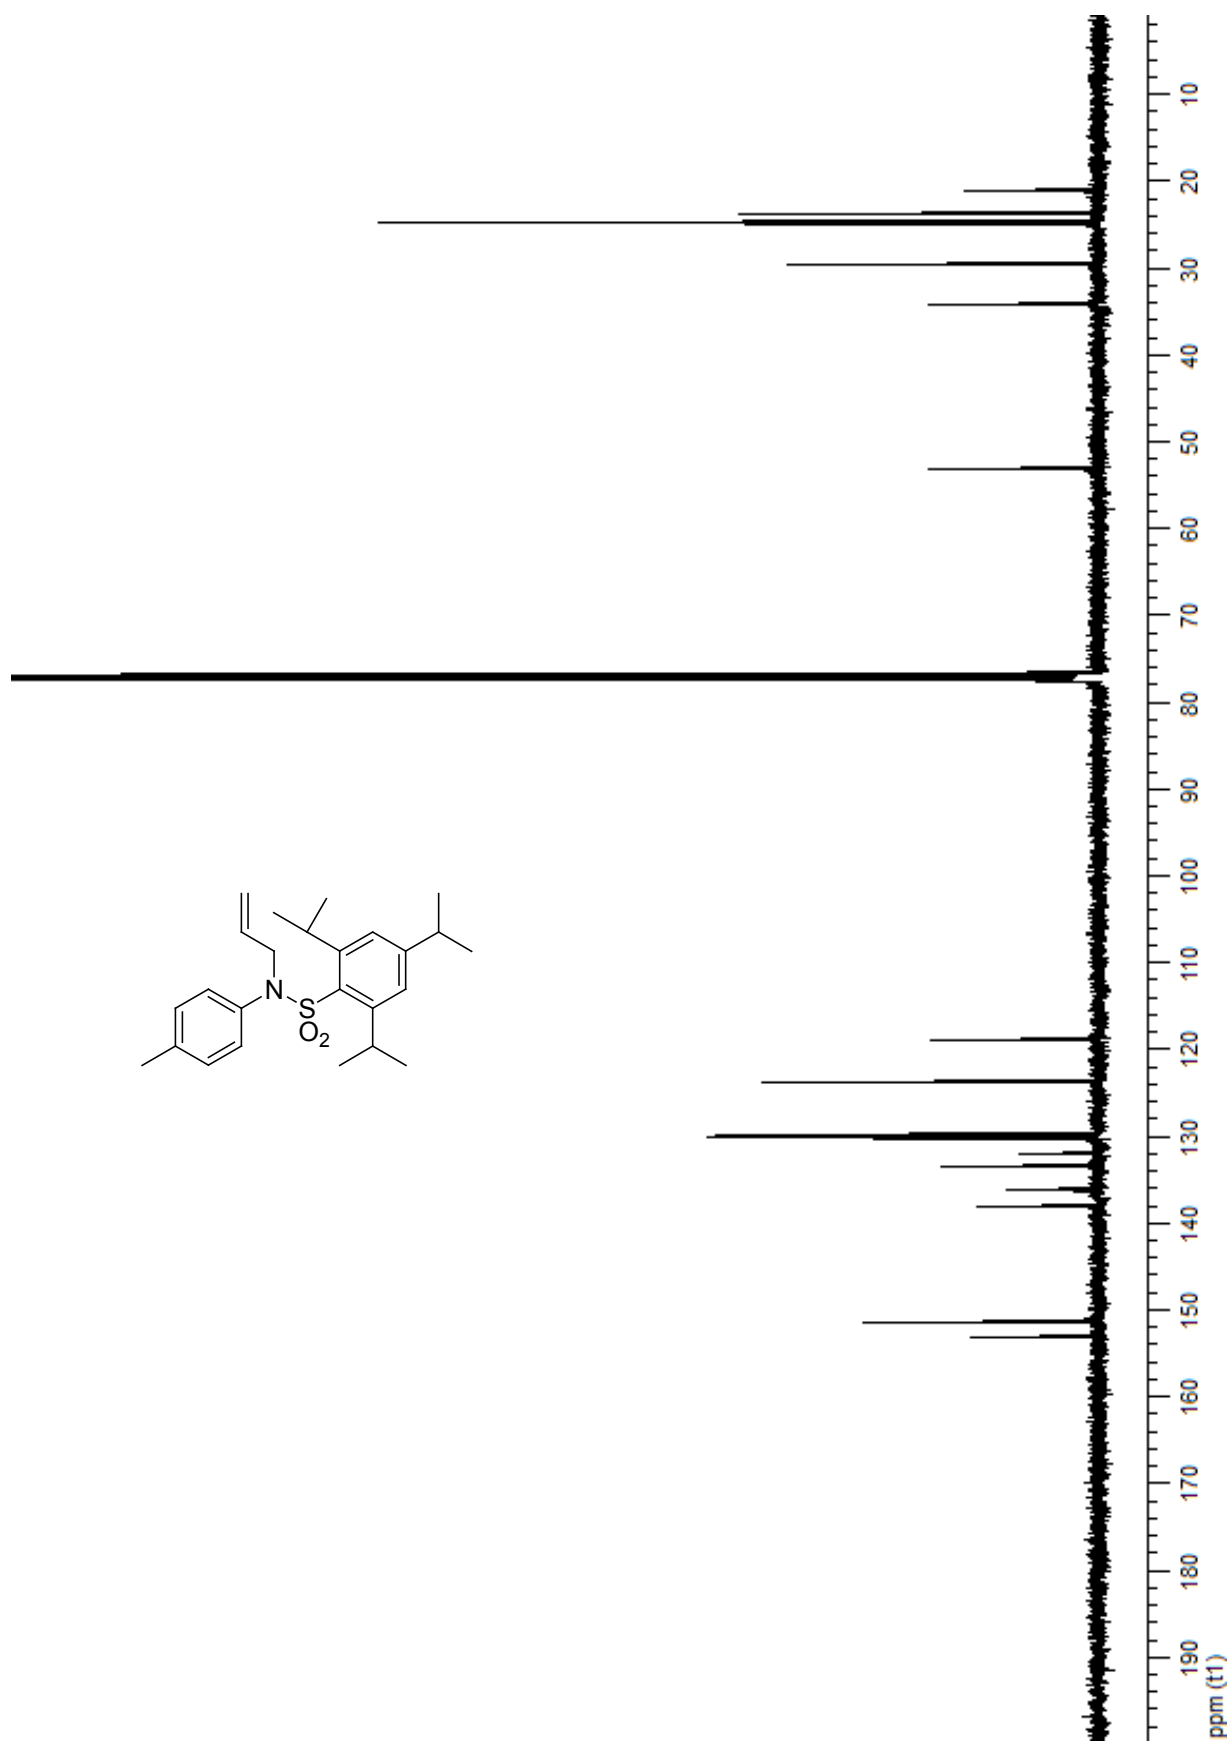

### Compound 3f

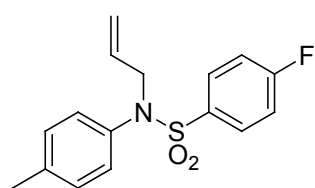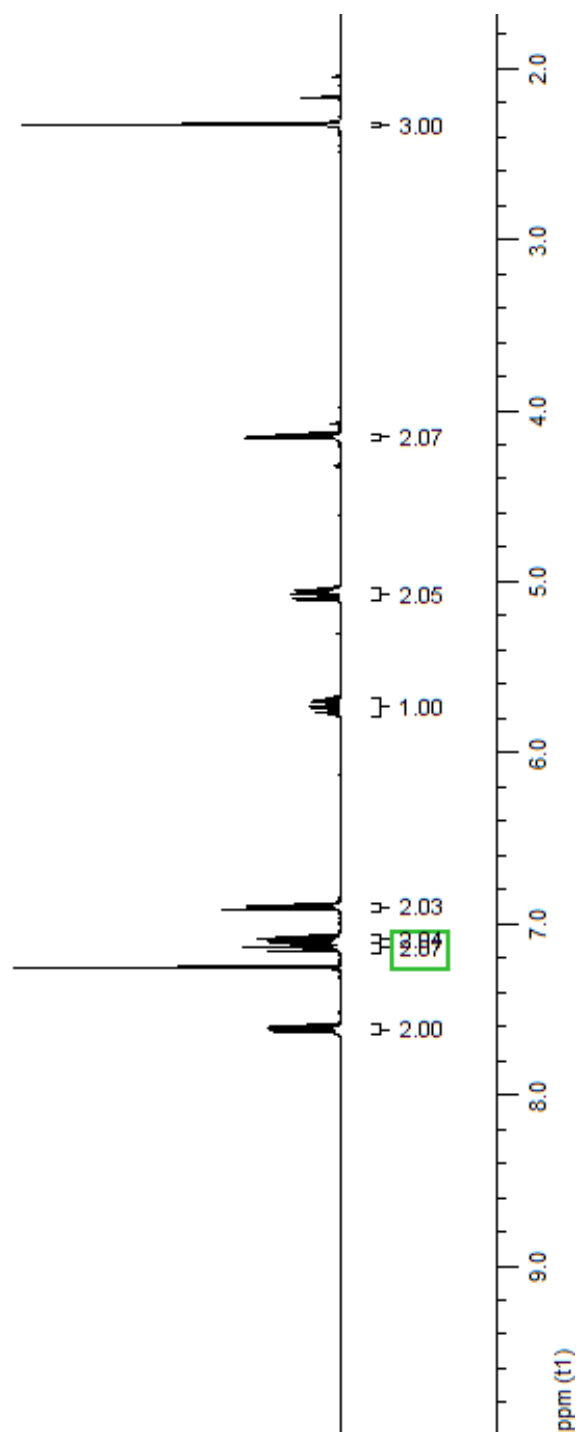

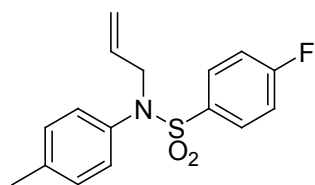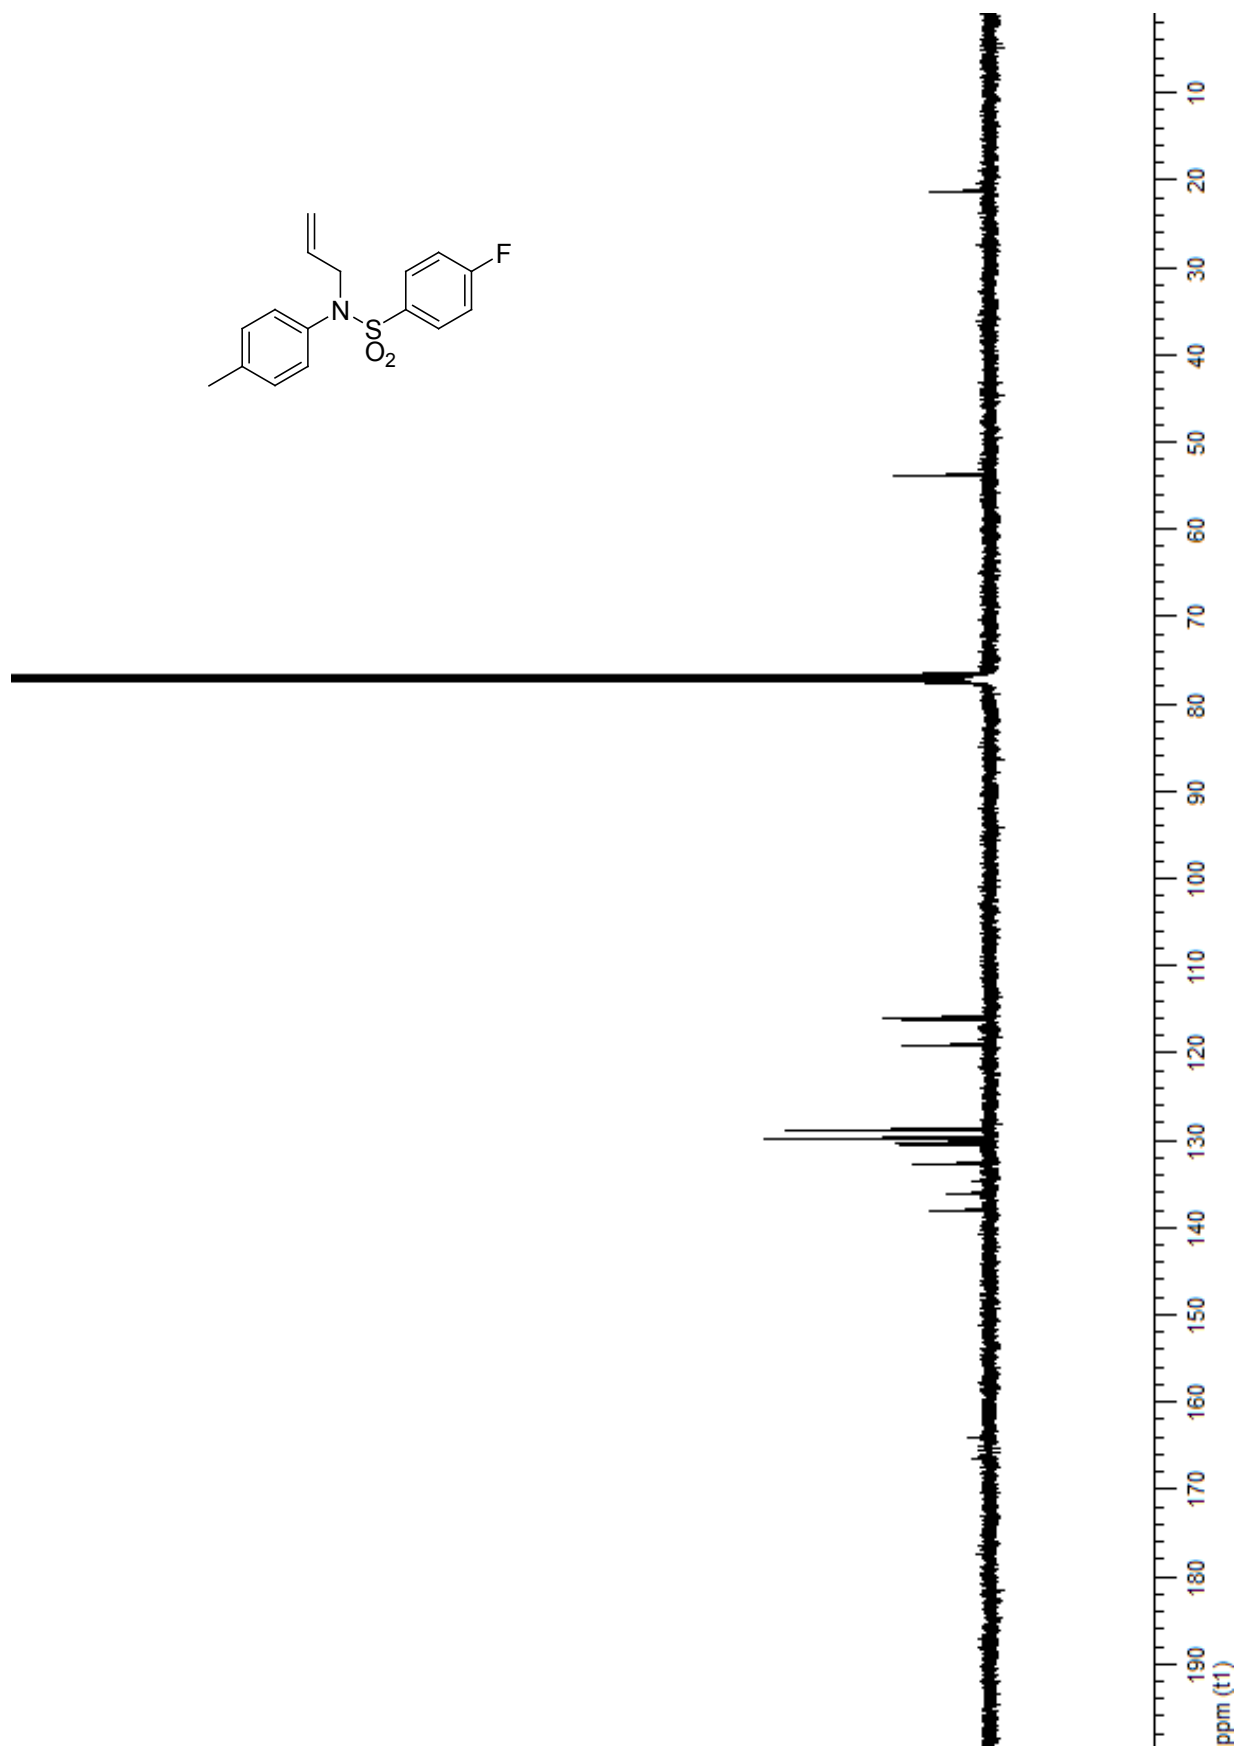

### Compound 3g

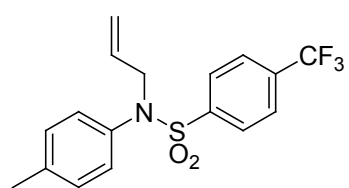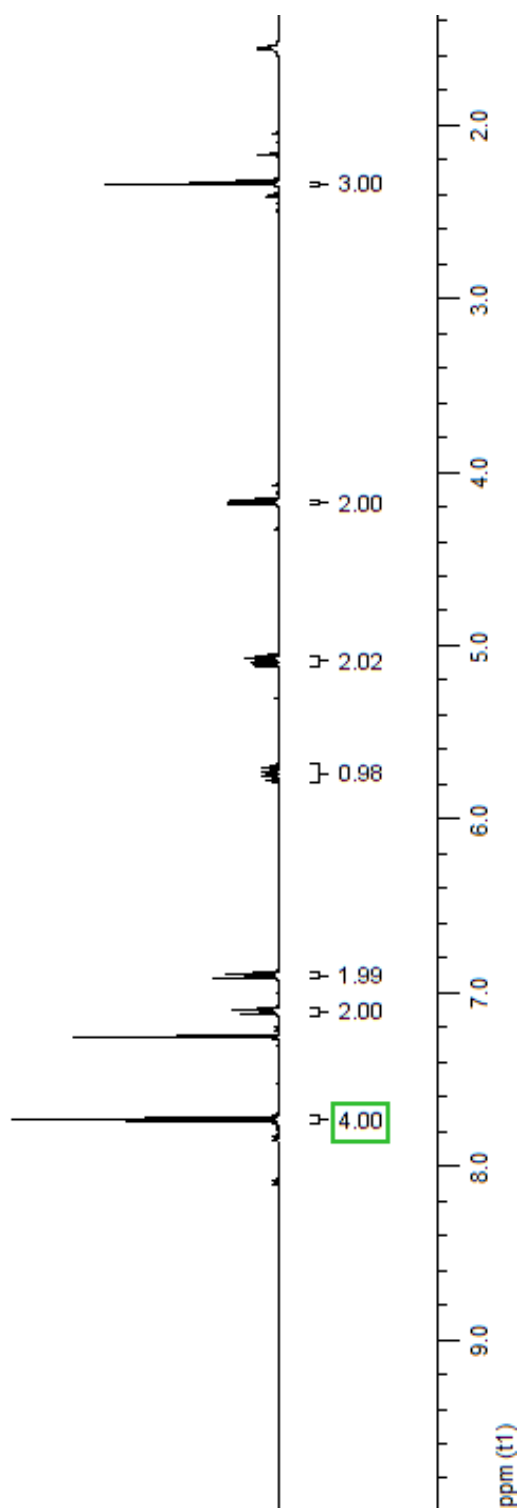

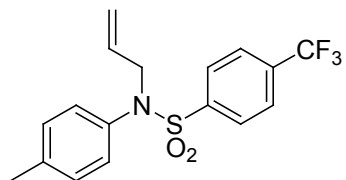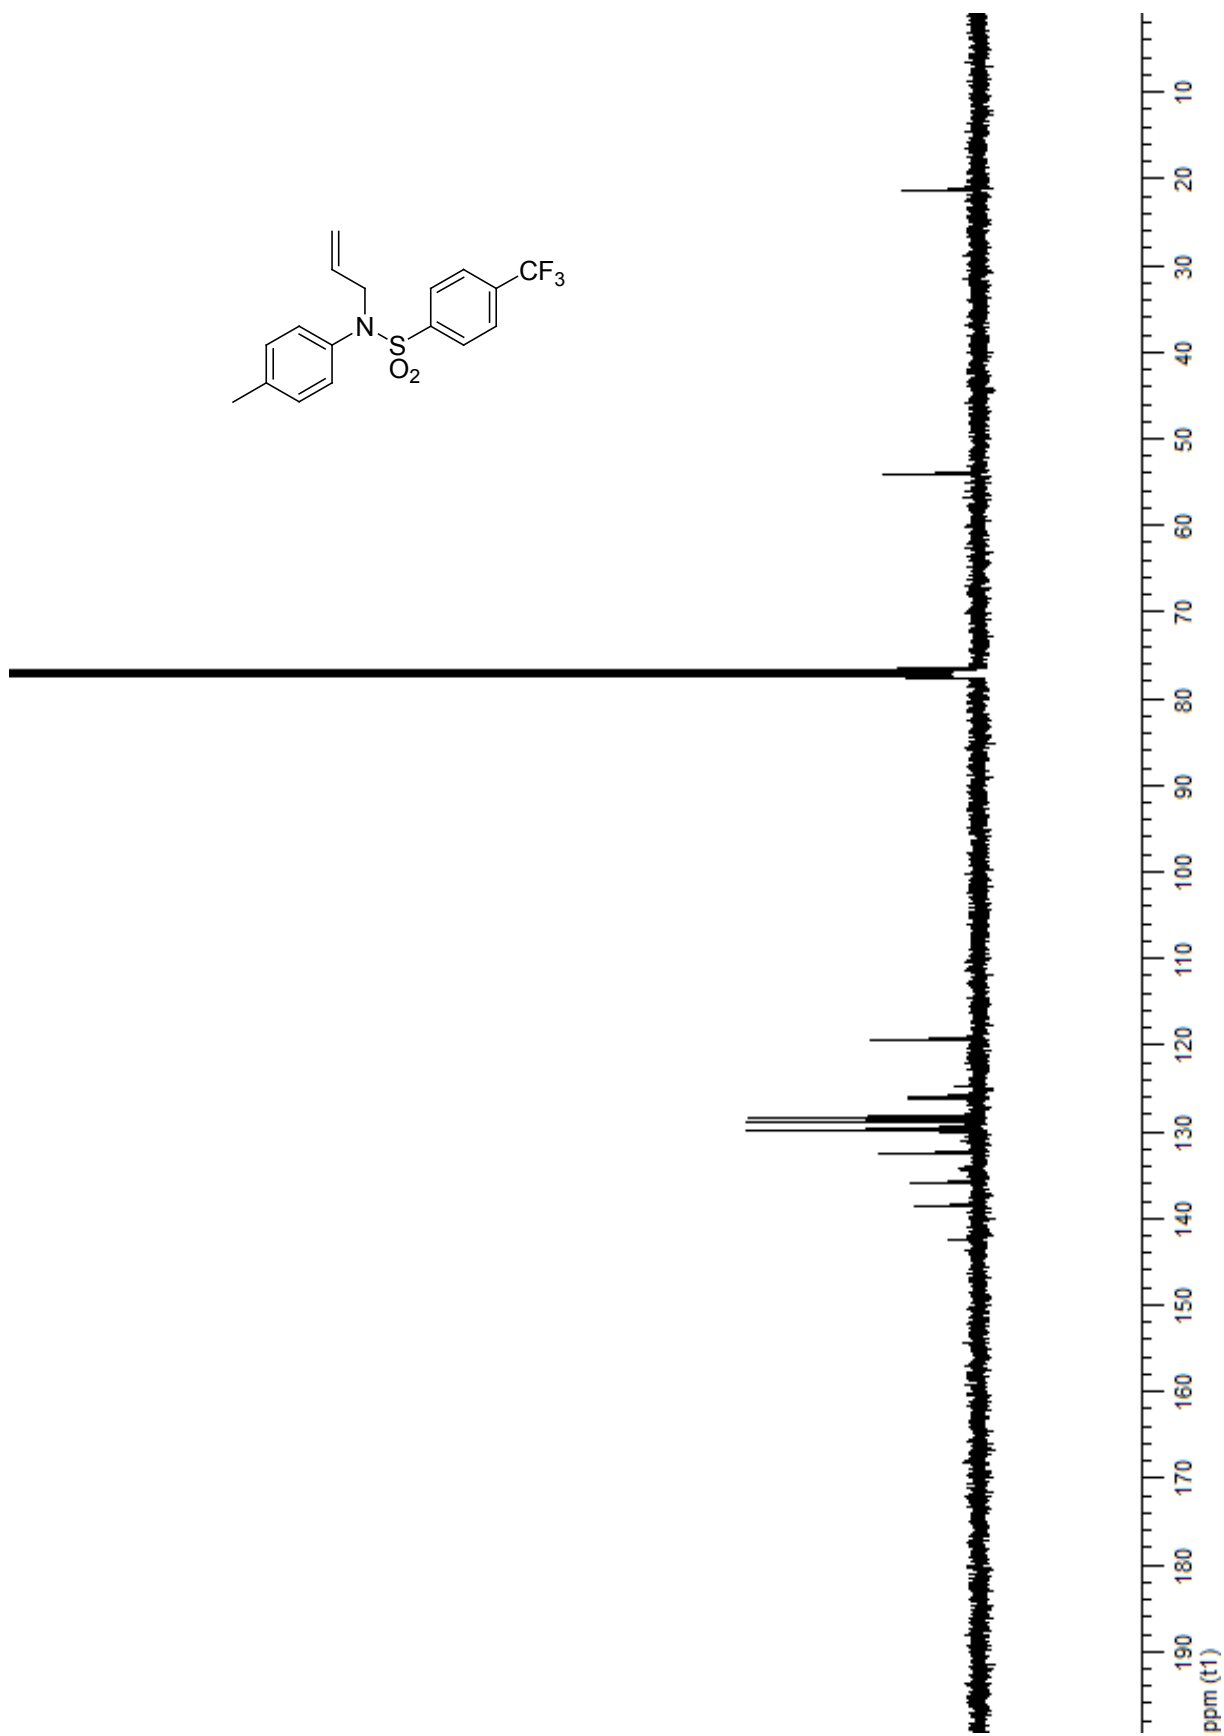

### Compound 3h

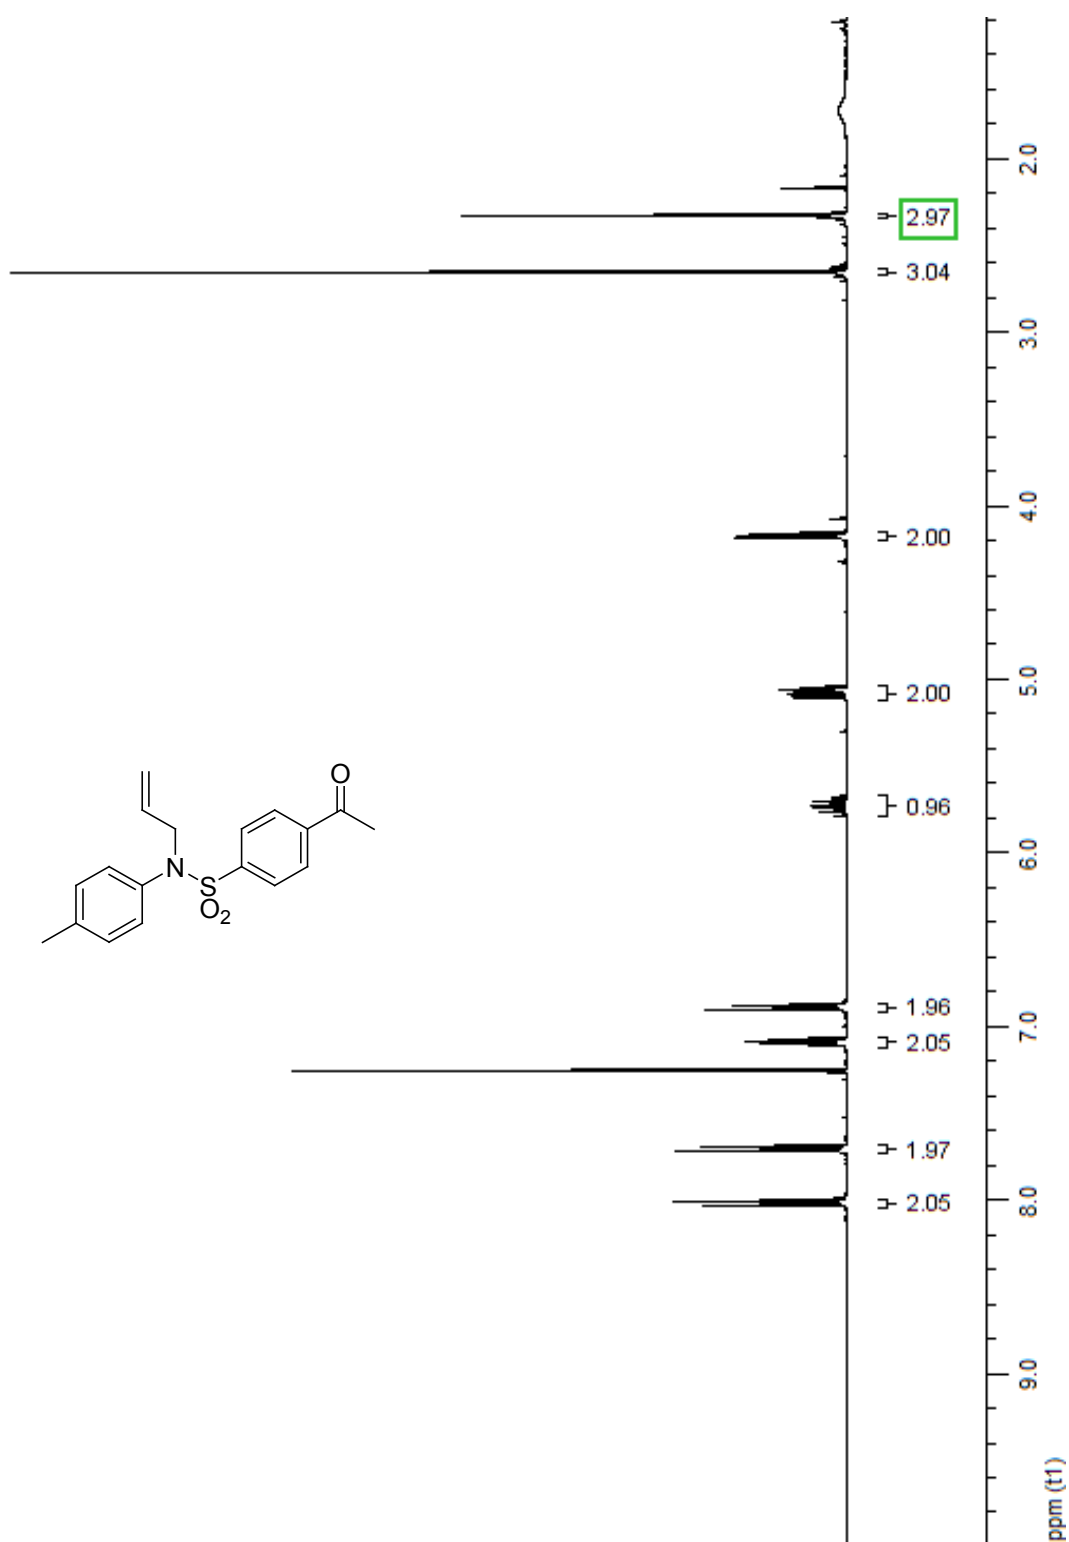



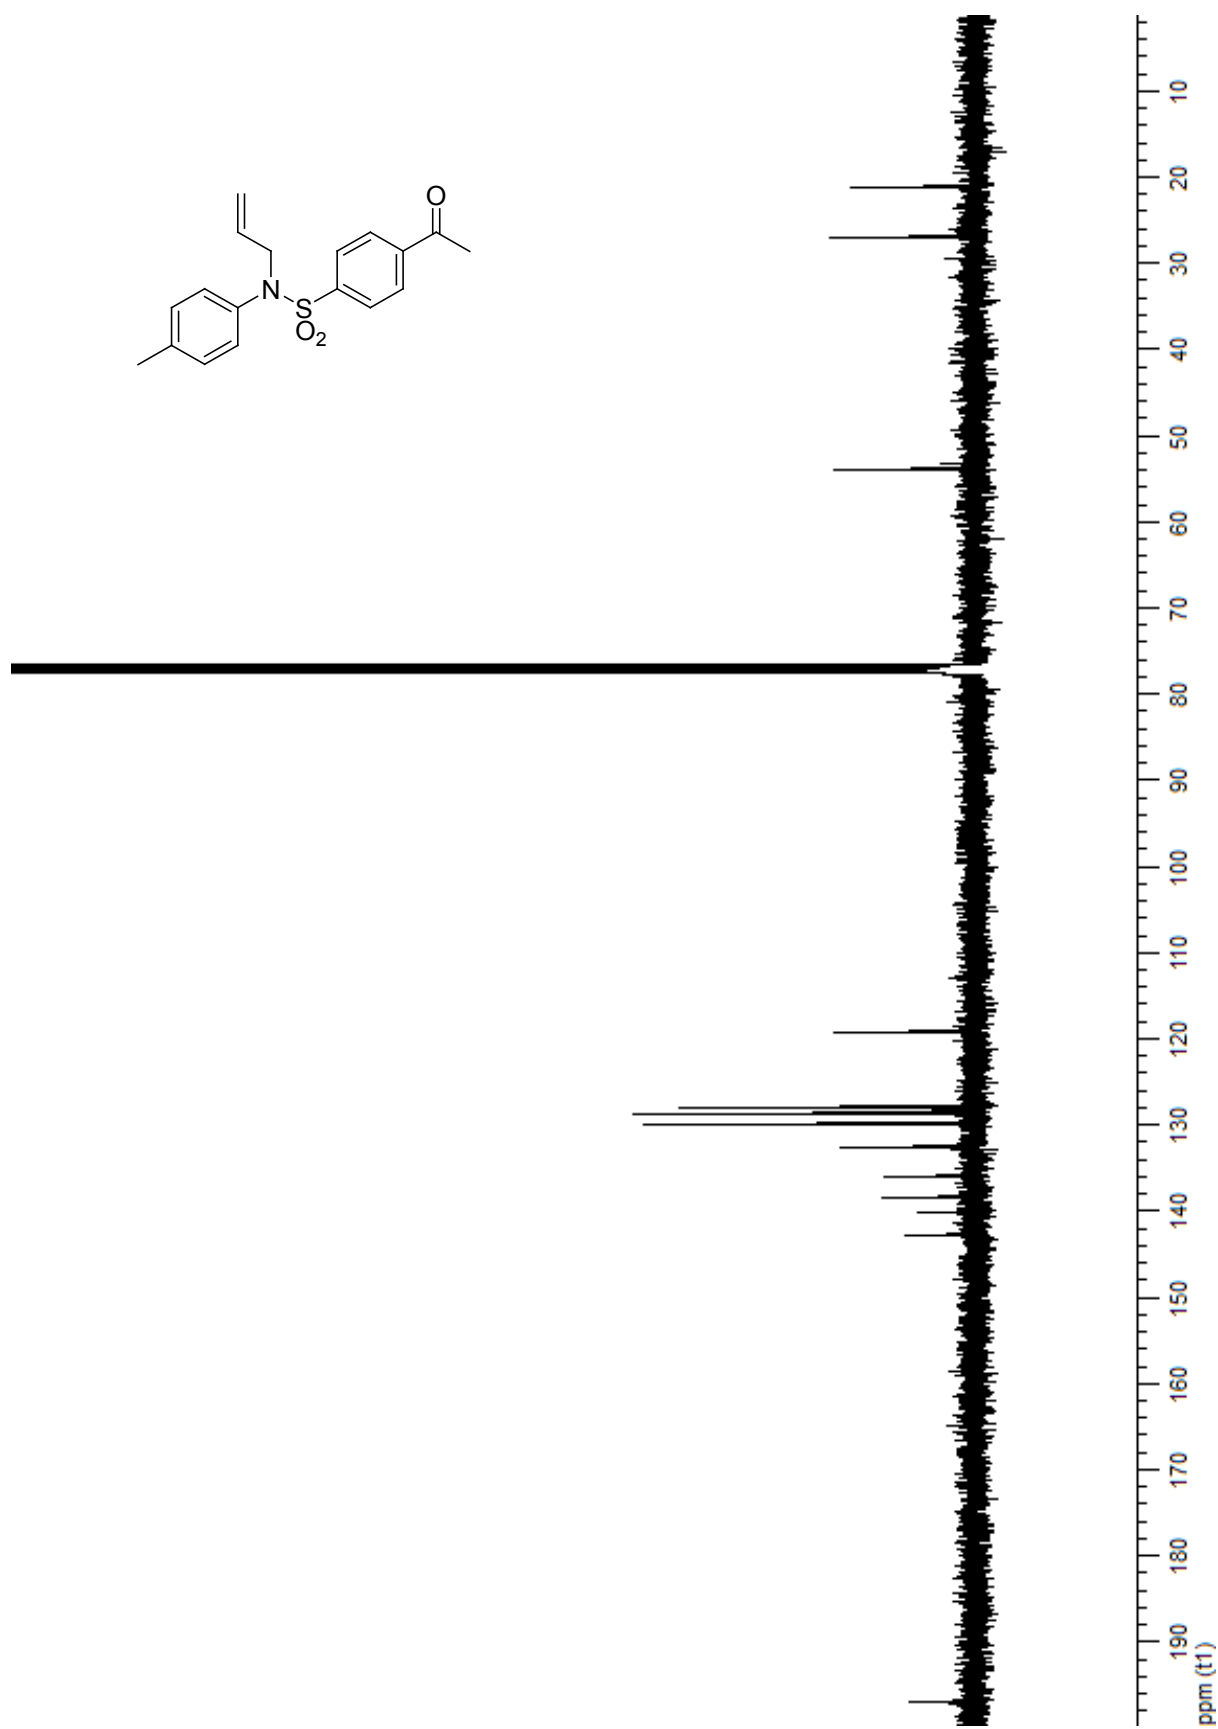

### Compound 4f

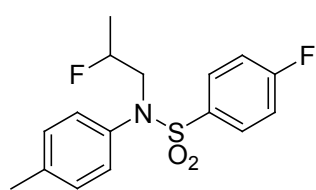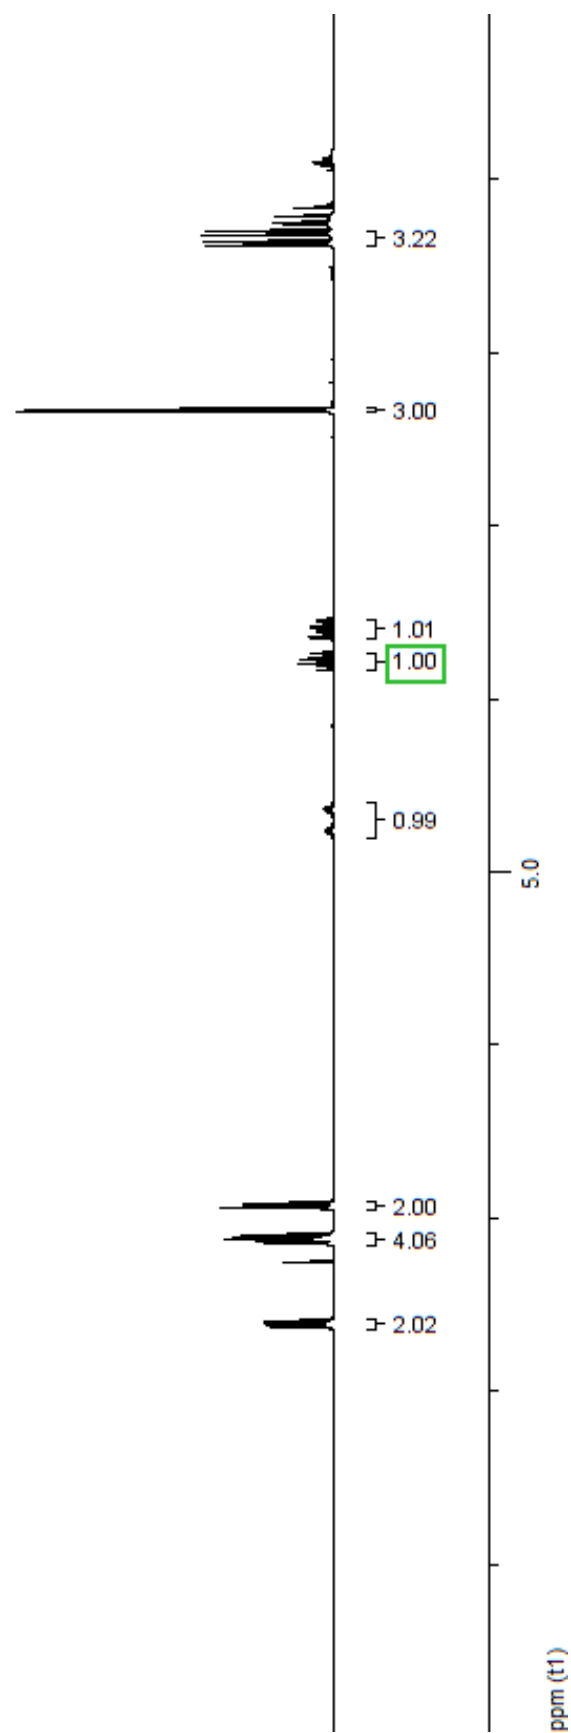

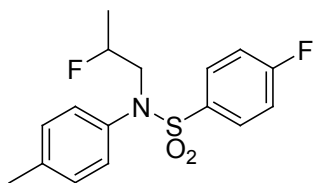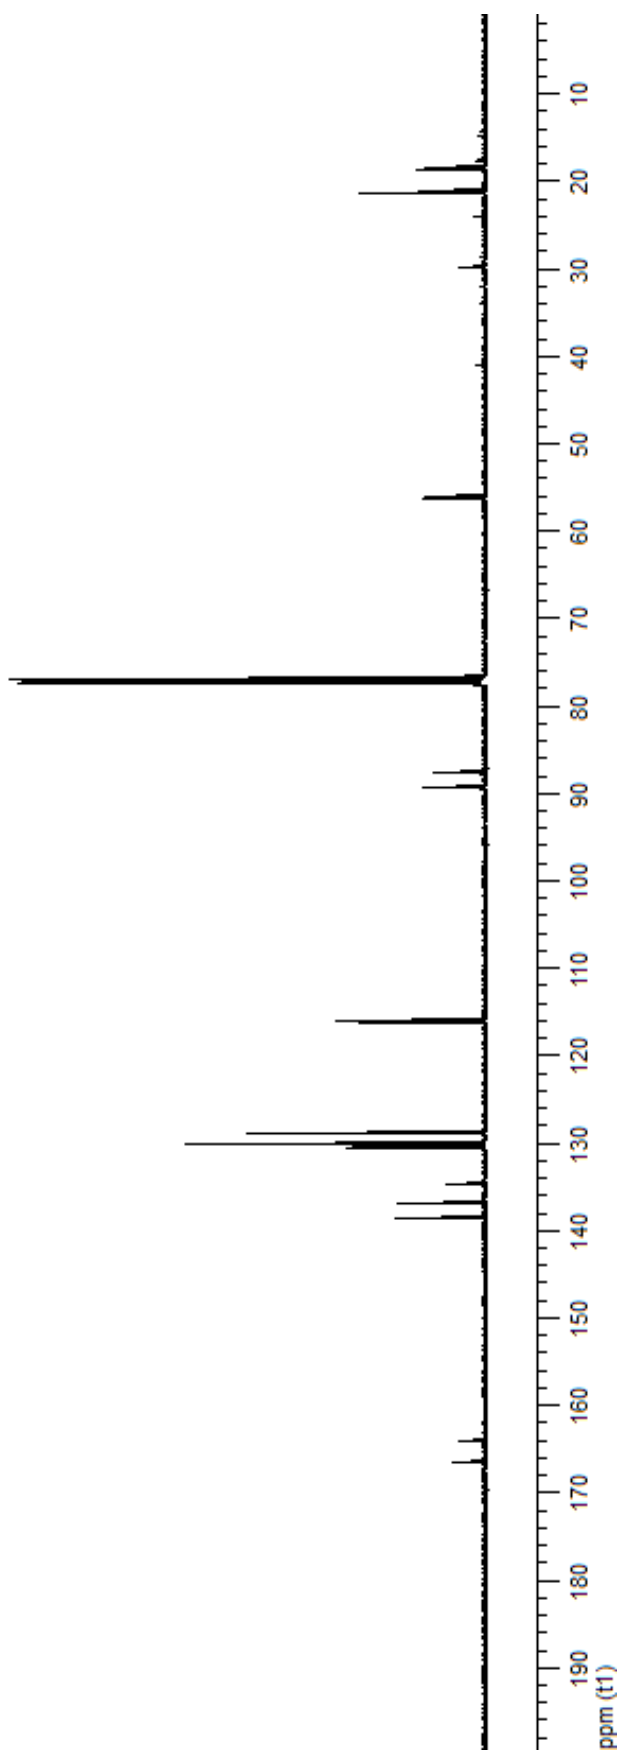

### Compound 4g

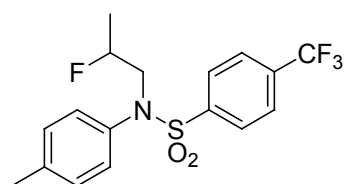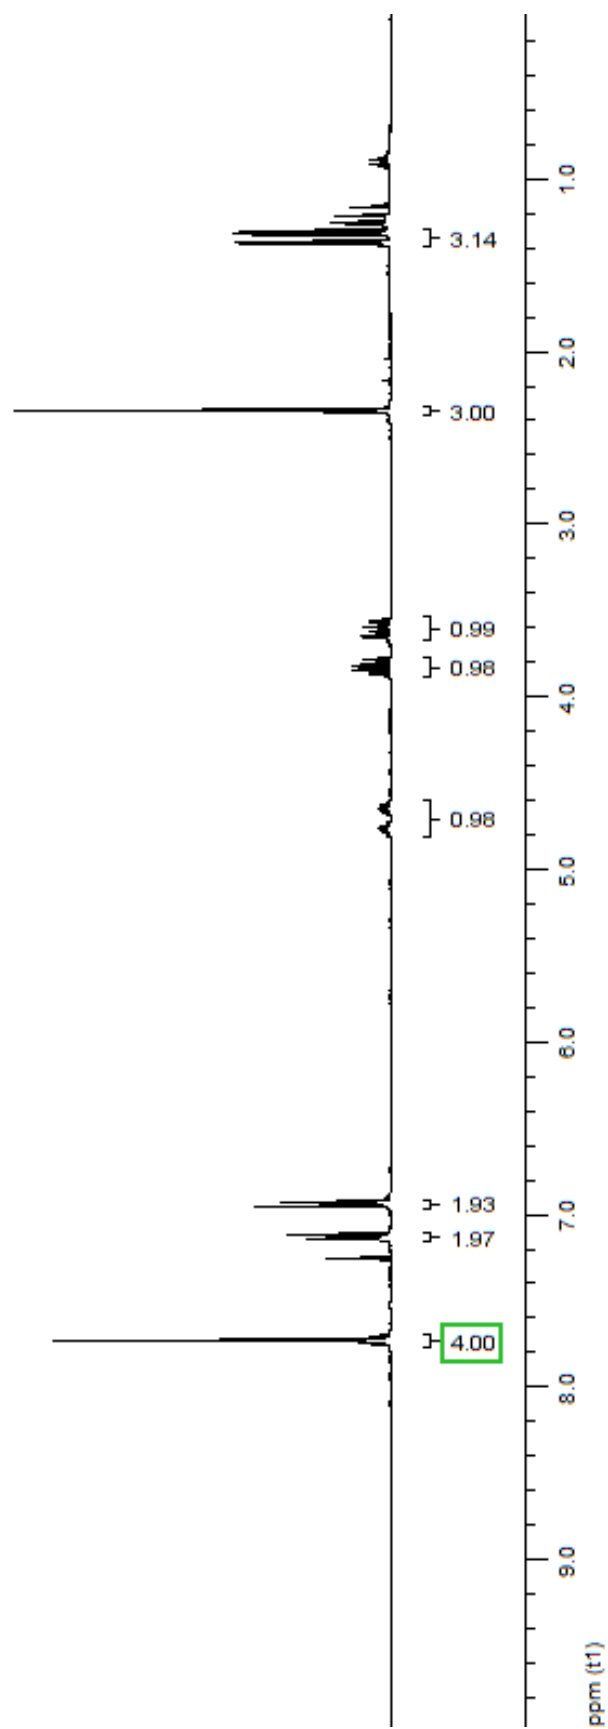

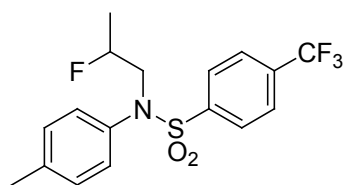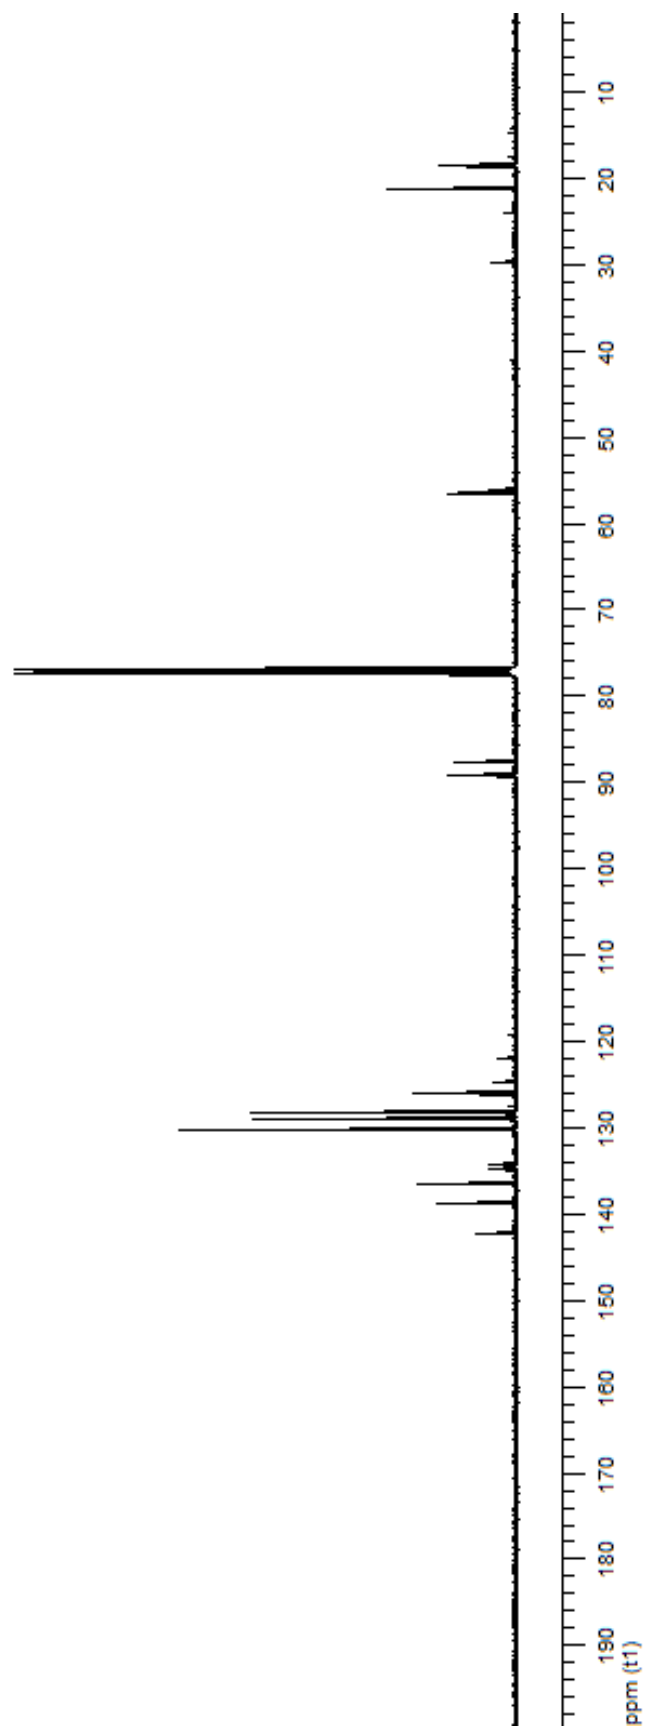

### Compound 4h

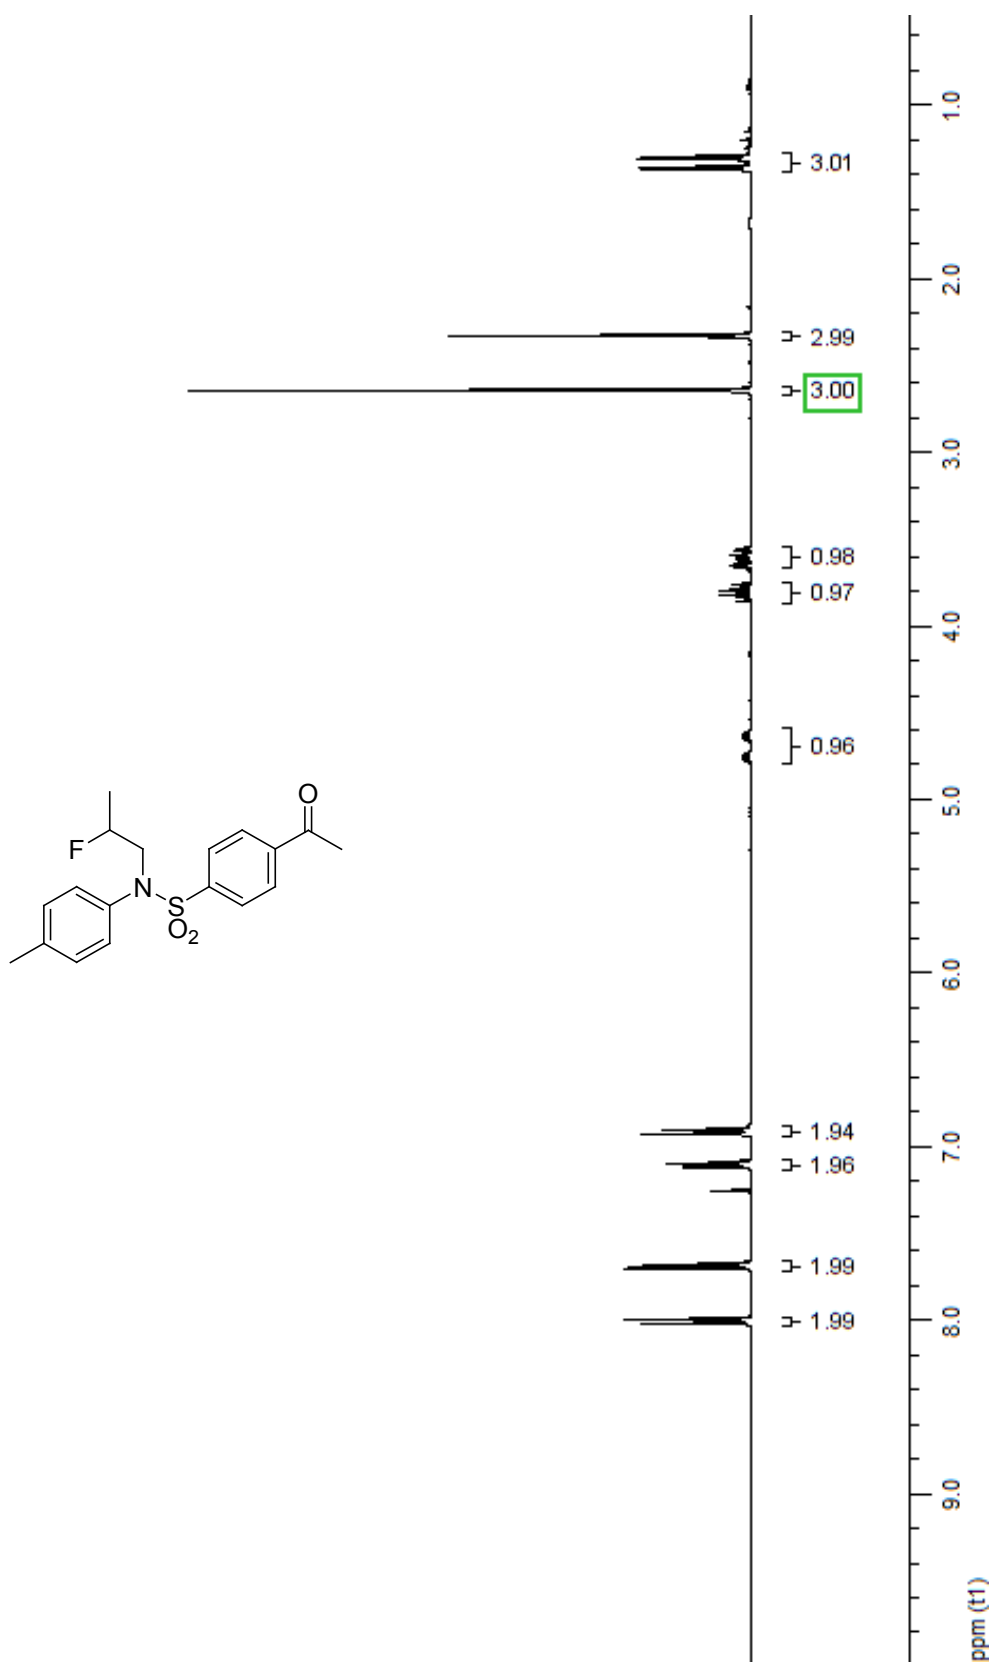

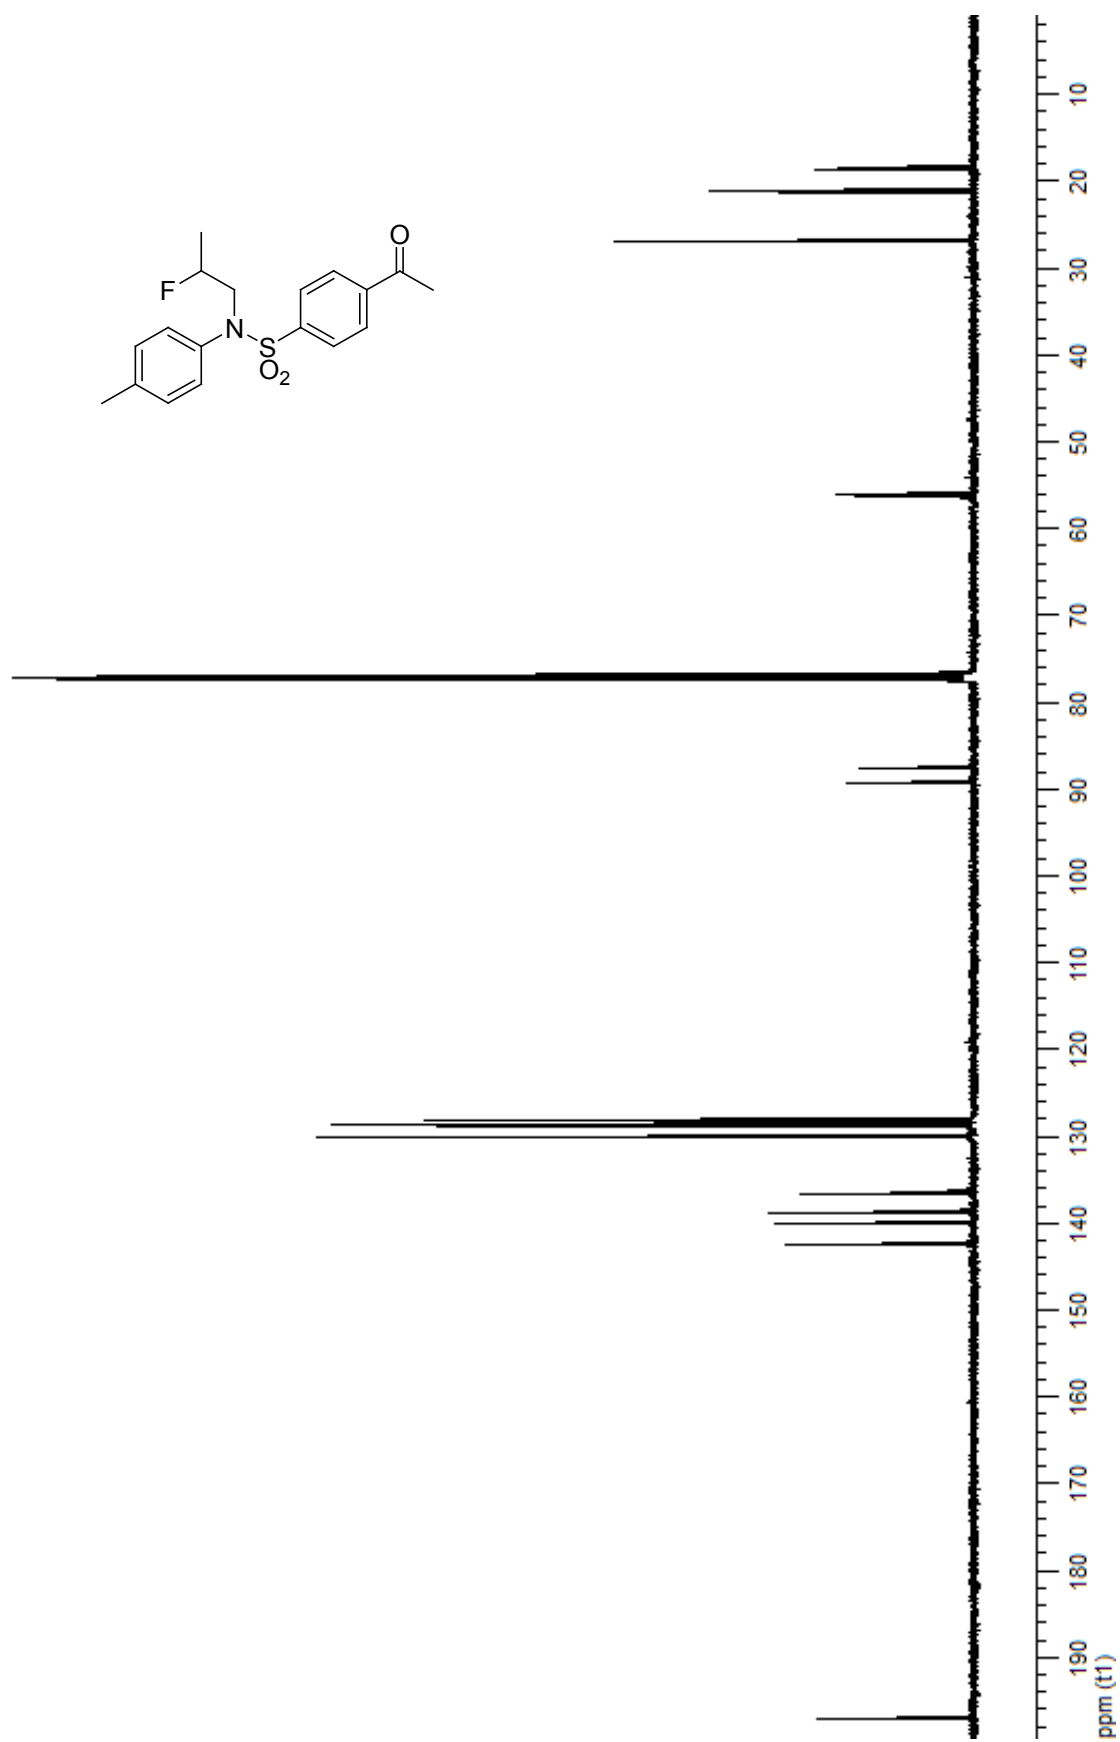

### Compound 5

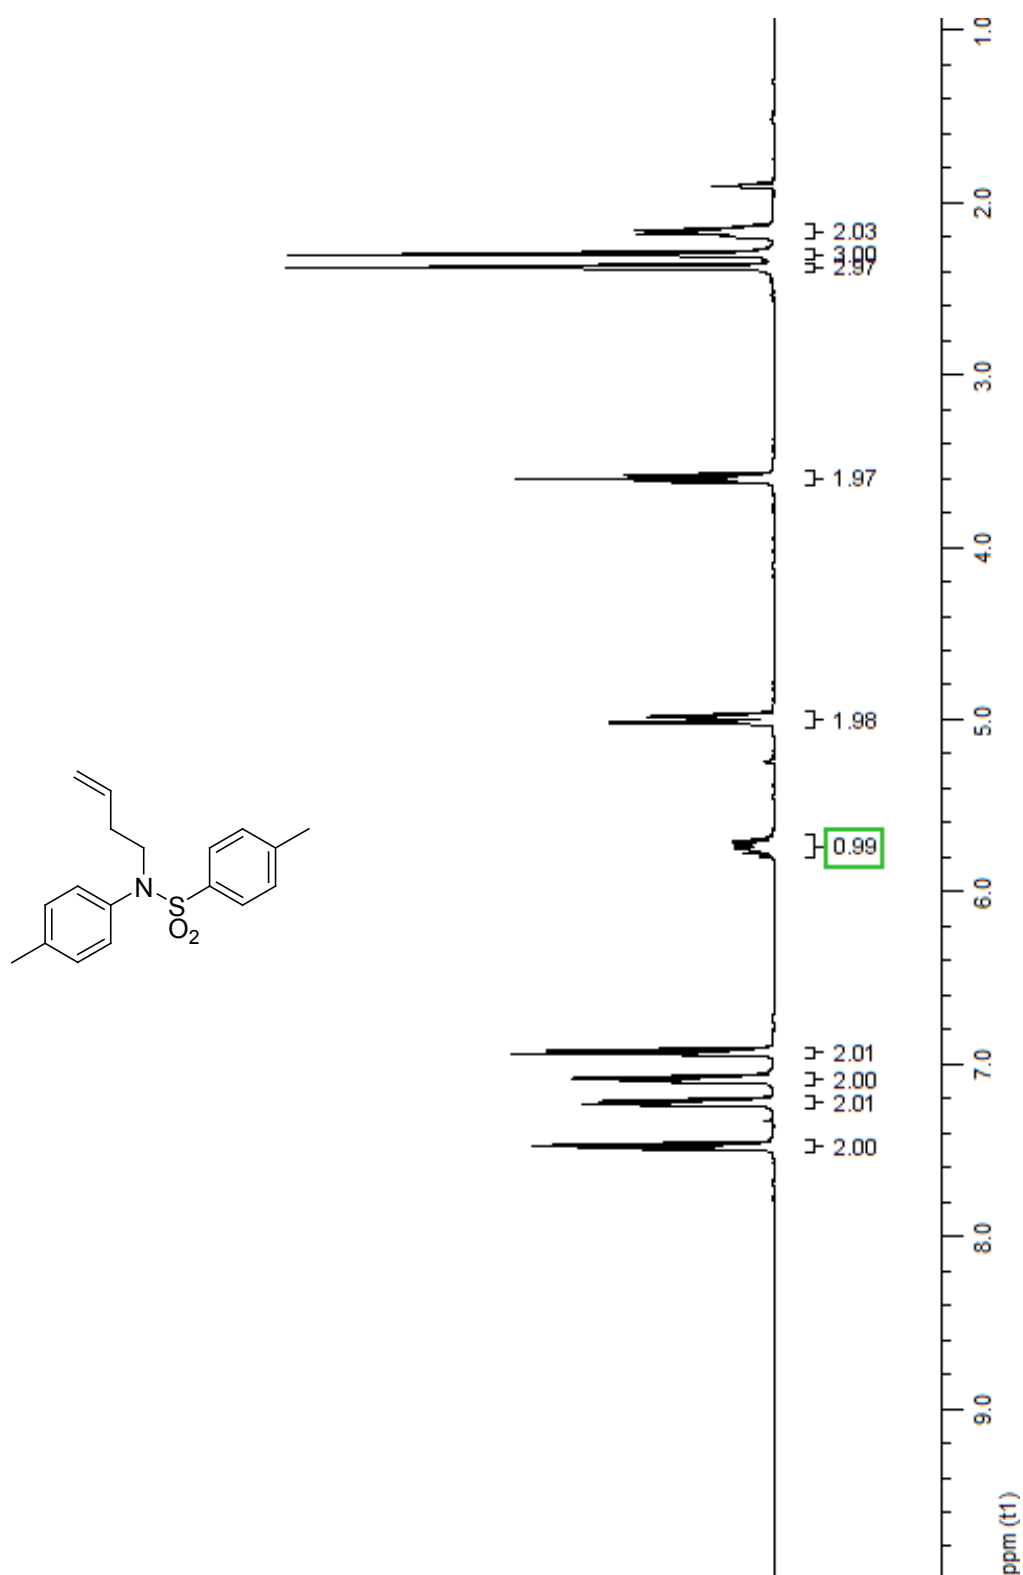



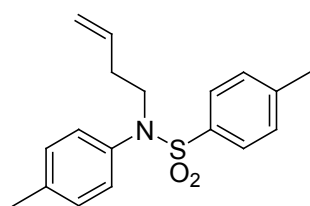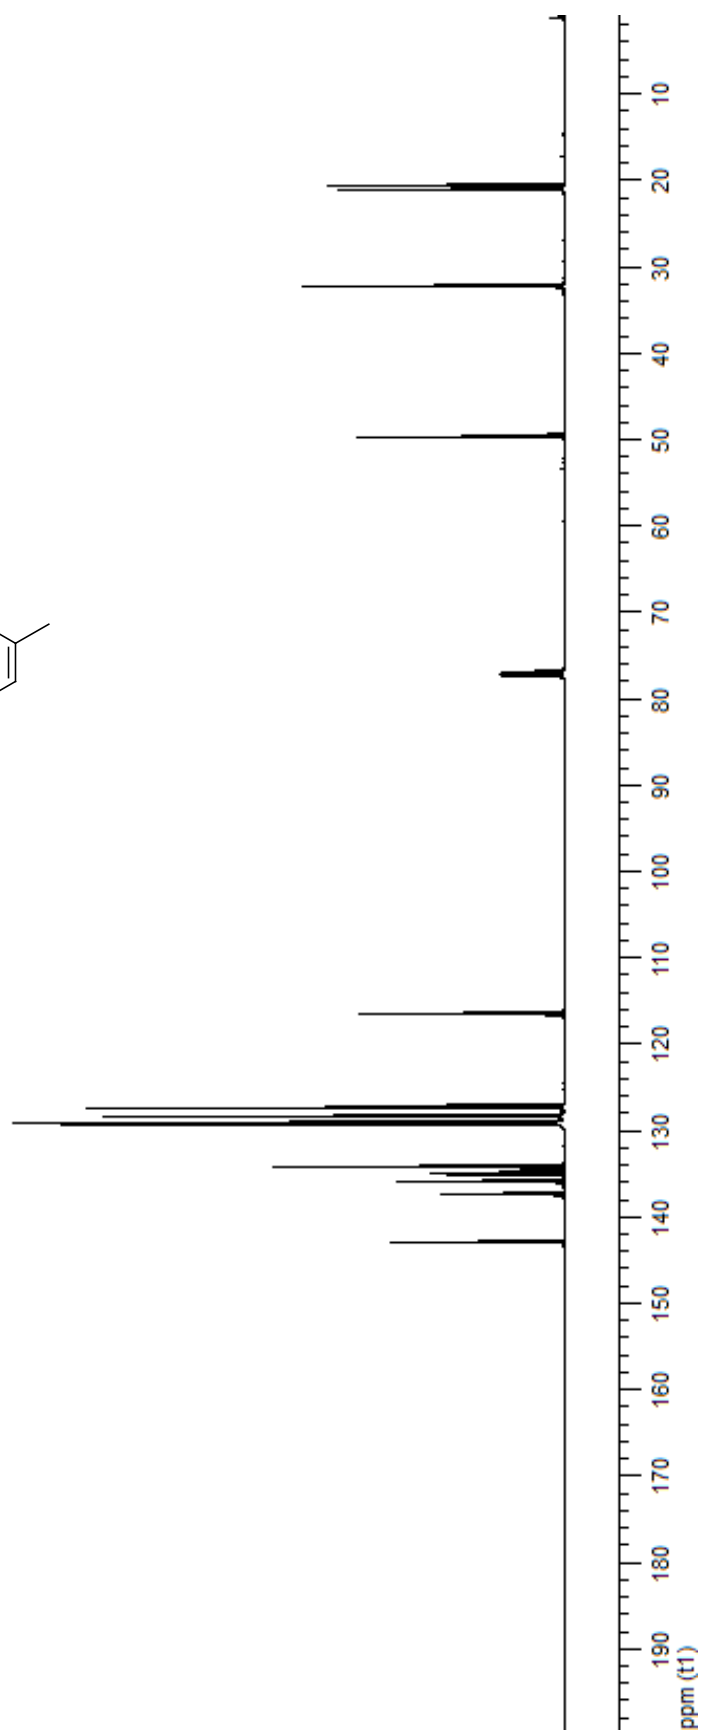

### Compound 6a

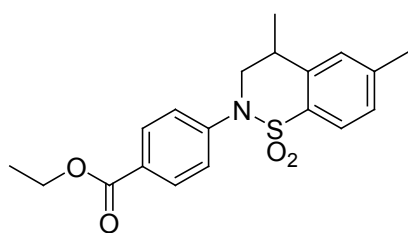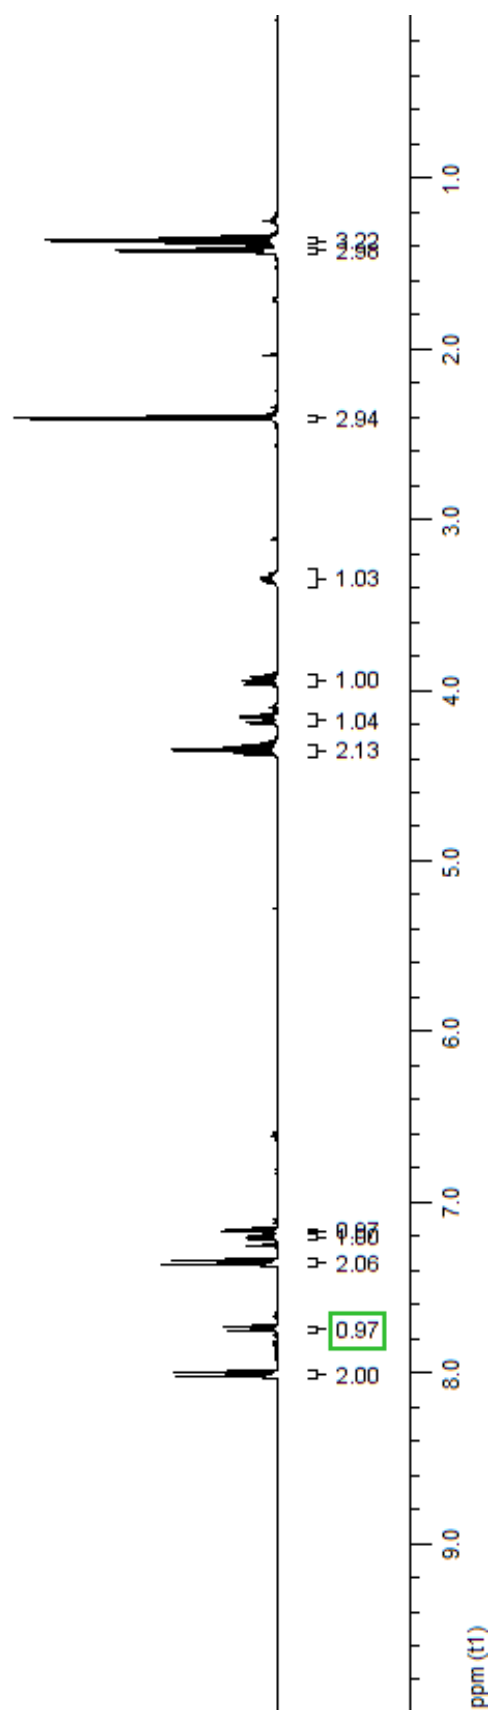

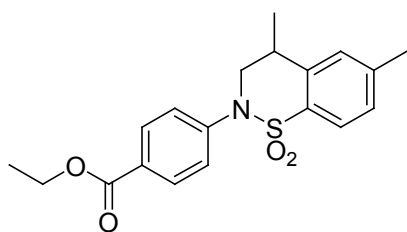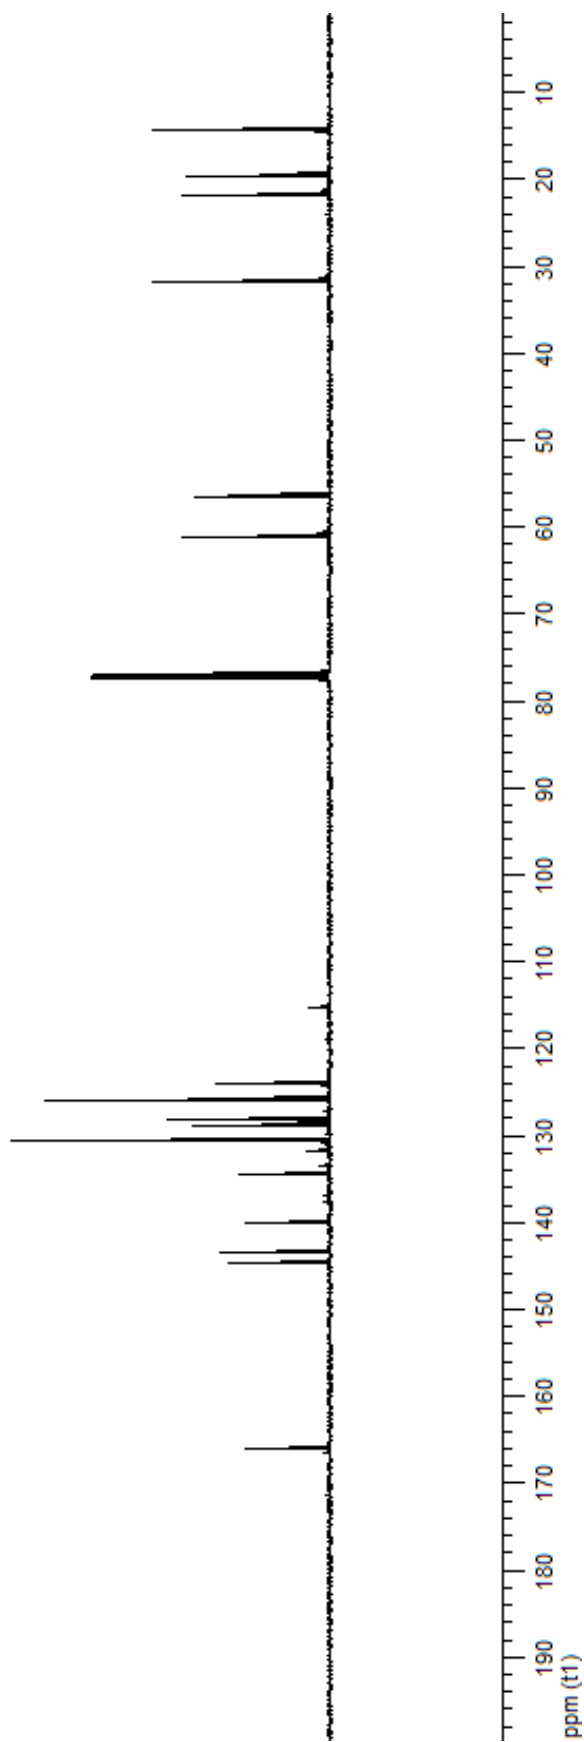

### Compound 6b

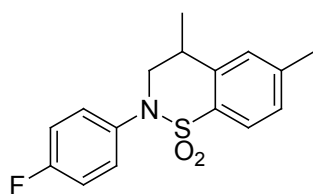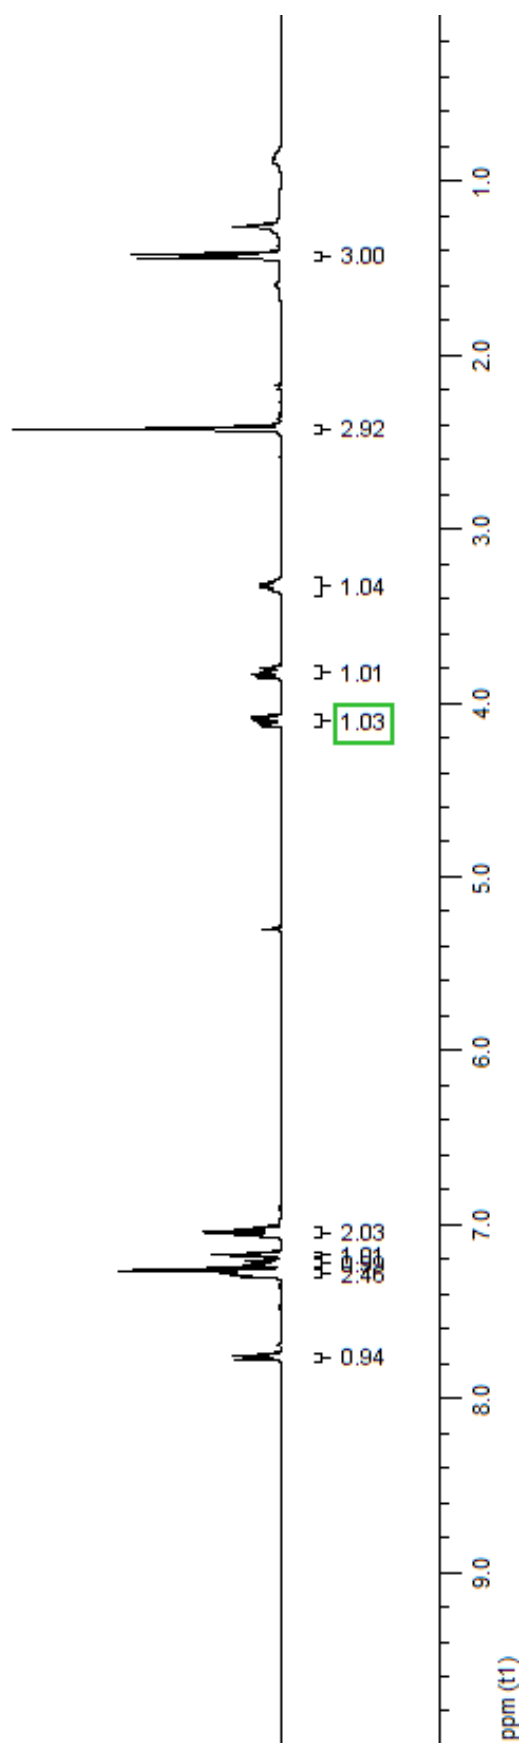

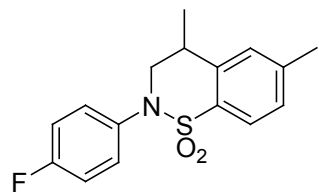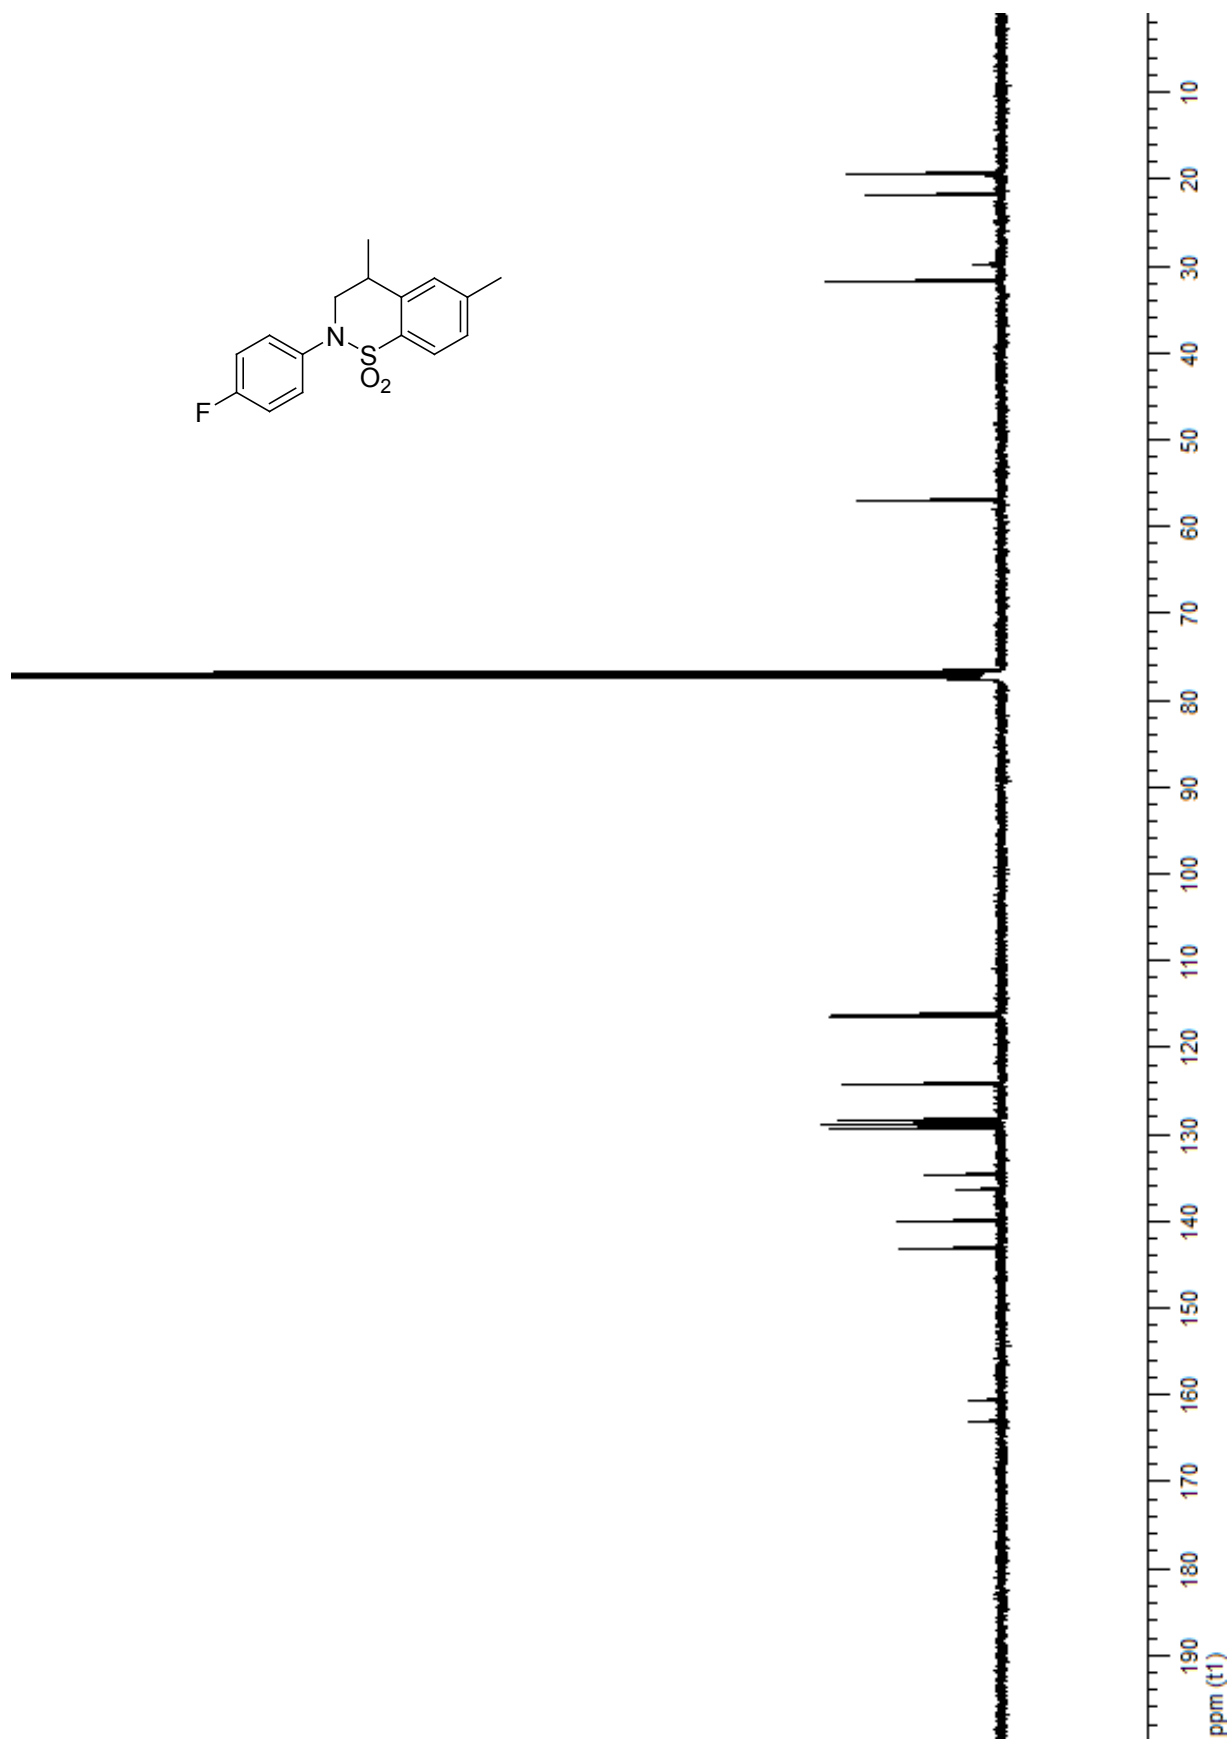

### Compound 6c

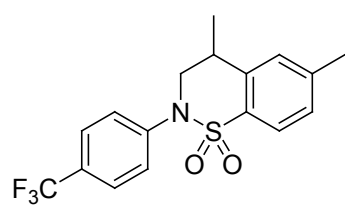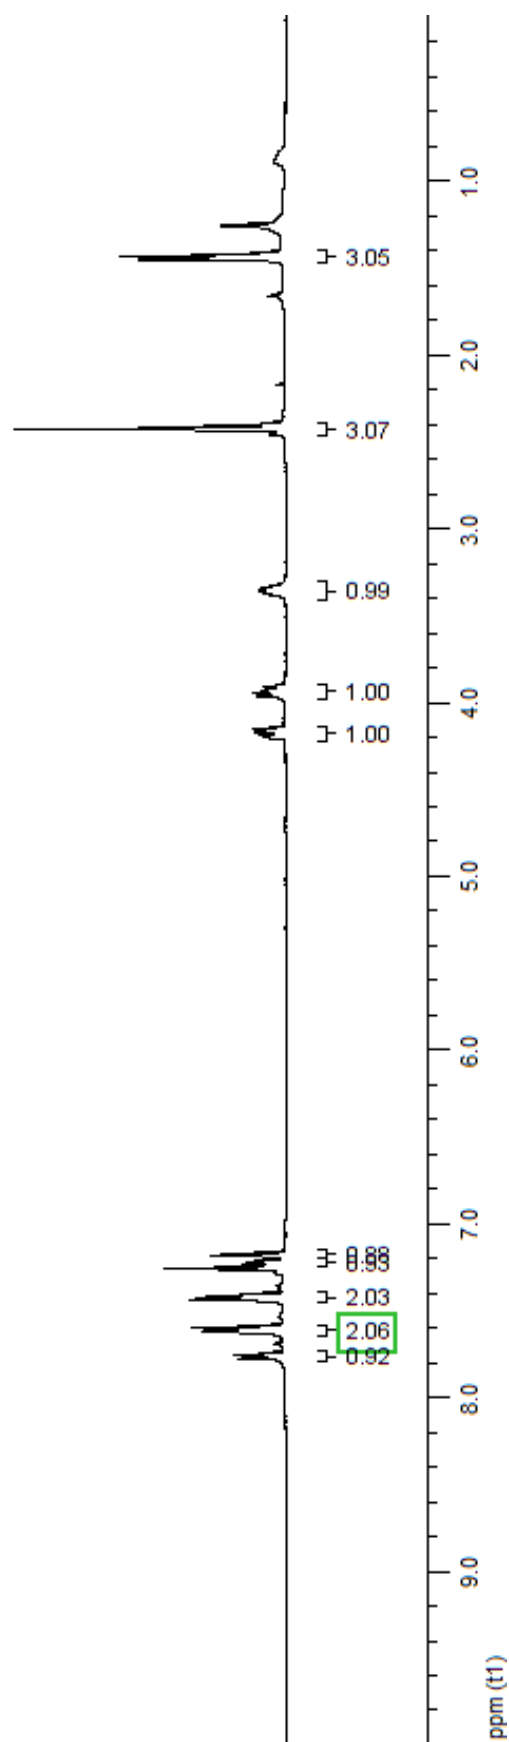

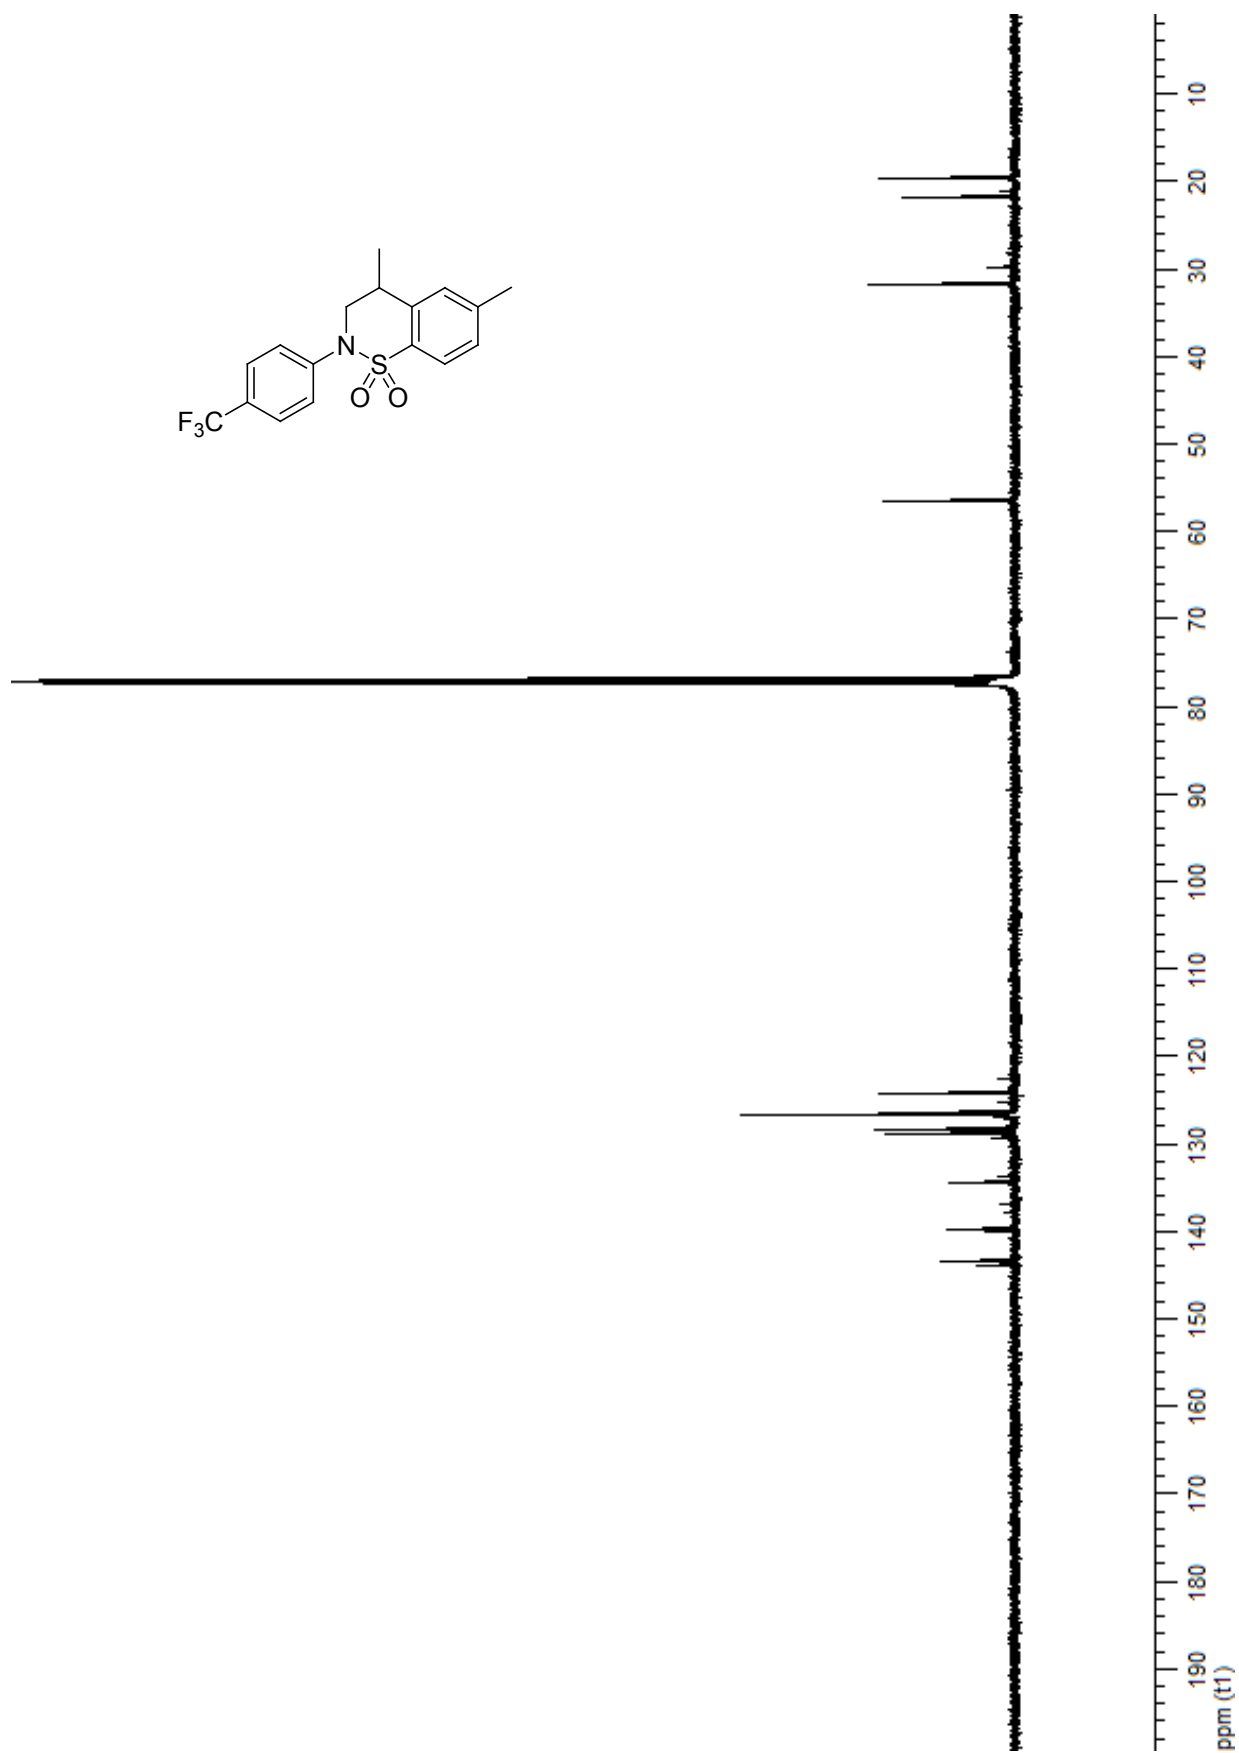

Intermediate E : low temperature  $^{13}\text{C}$  NMR and DEPT

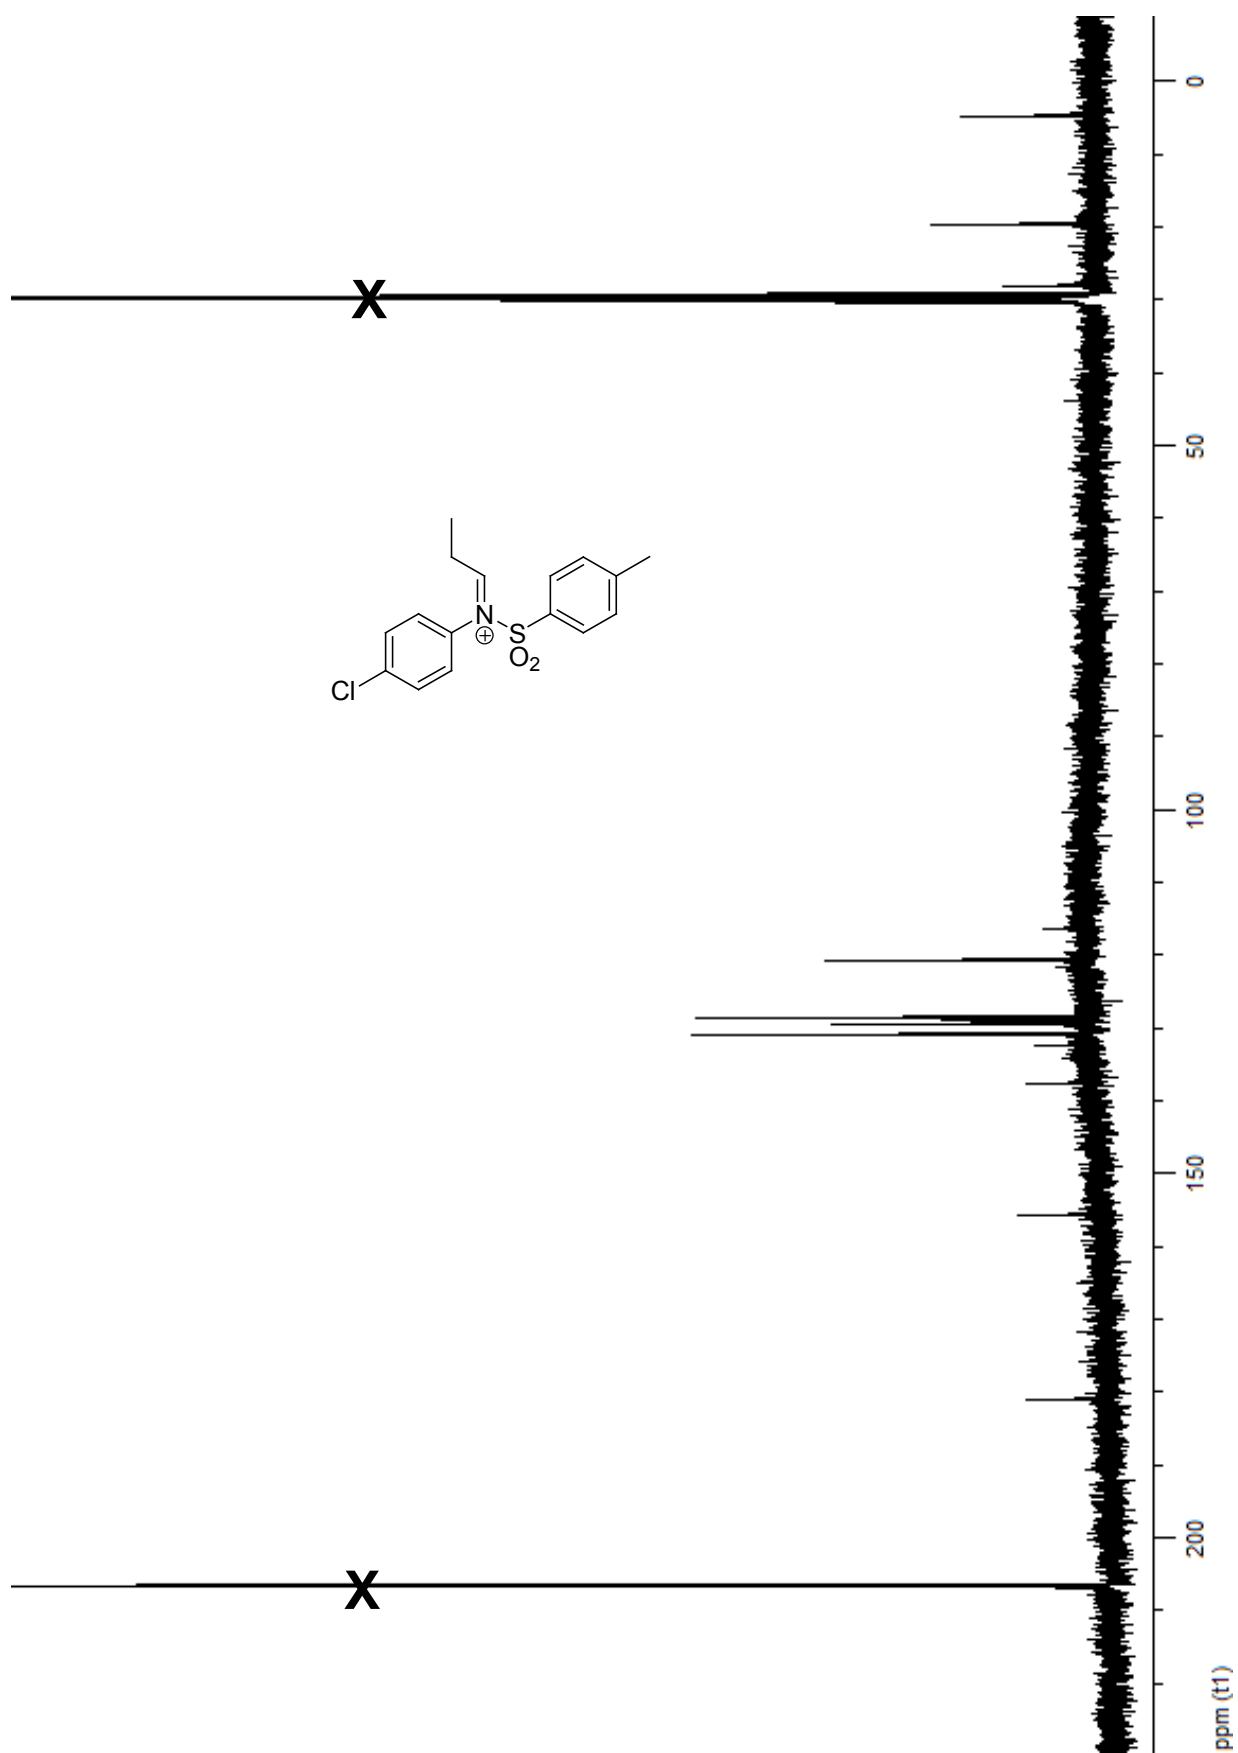



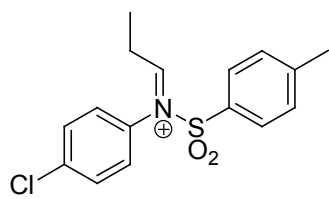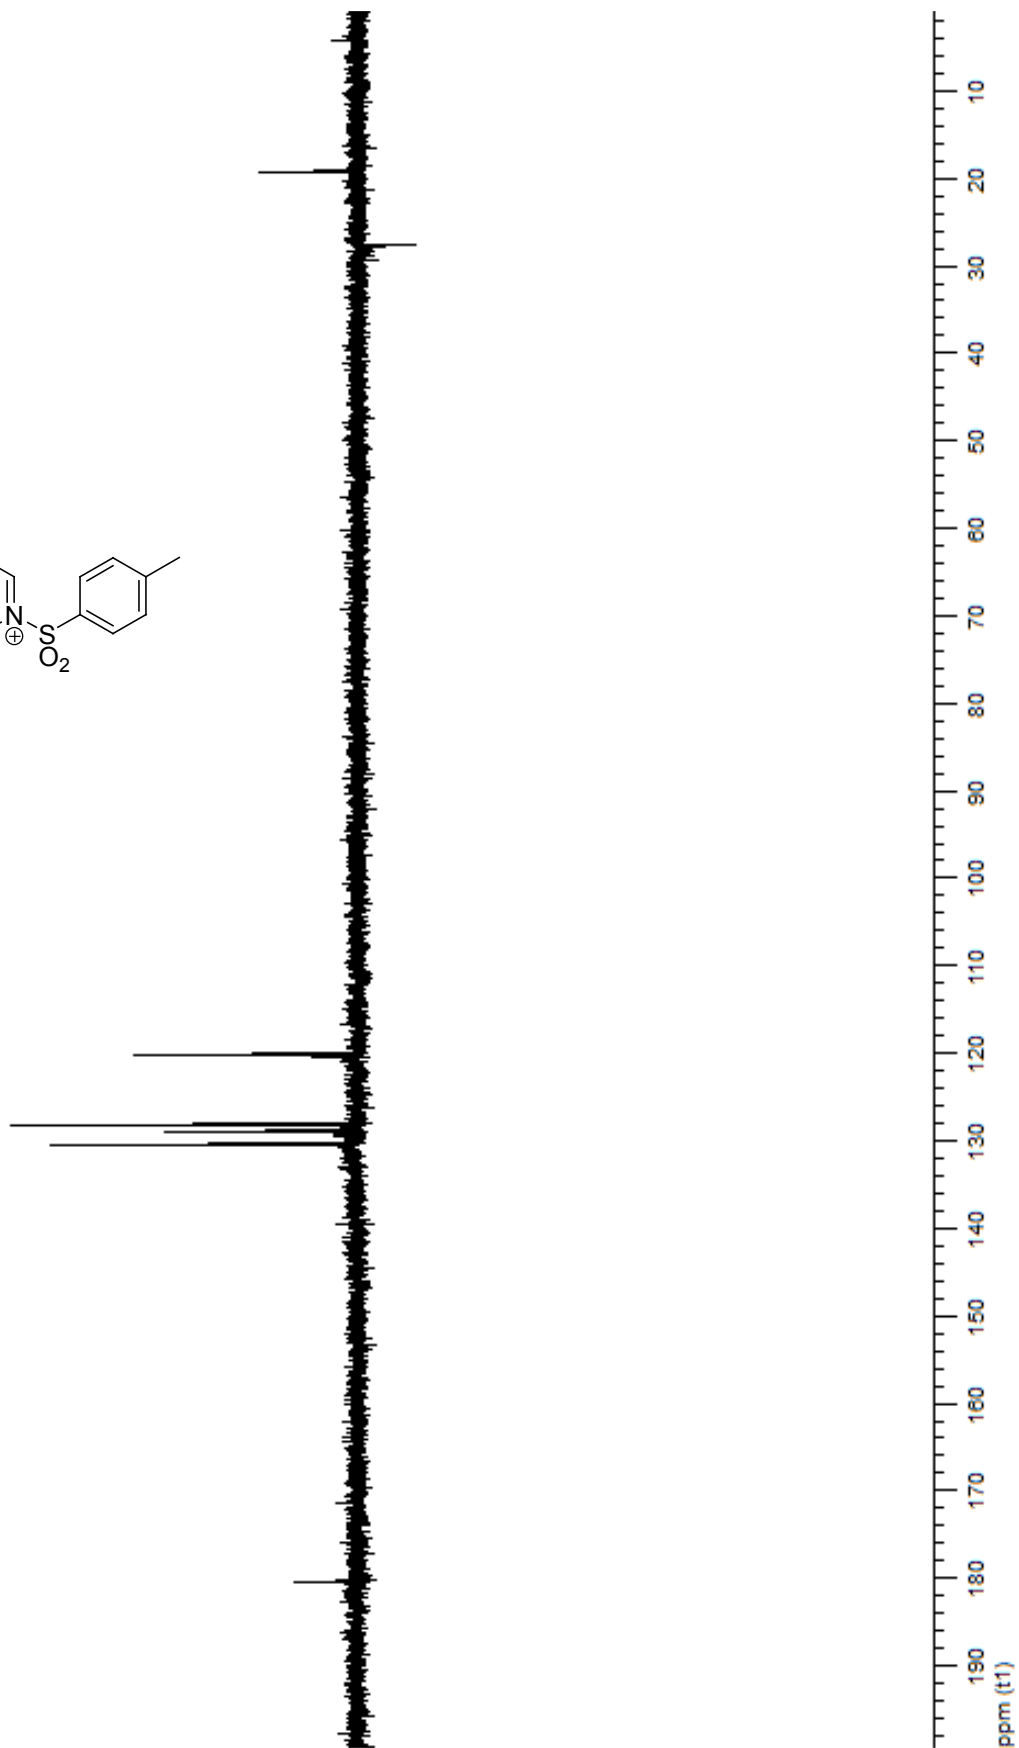

Supplement: c3ob41538d.pdf [file c3ob41538d.pdf]
